# Supplementary material for: Enzymatic Cascades for Tailored 13C6 and 15N Enriched Human Milk Oligosaccharides
Source: PubMed Central journal article supplement (PMC6803985; doi:10.3390/molecules24193482), 2019-09-25
Supplement: molecules-24-03482-s001.pdf [file molecules-24-03482-s001.pdf]

## Supplementary Materials

# Enzymatic cascades for tailored $^{13}\text{C}_6$ and $^{15}\text{N}$ enriched human milk oligosaccharides

Thomas Fischöder <sup>1,†</sup>, Samanta Cajic <sup>2,†</sup>, Valerian Grote <sup>2</sup>, Raphael Heinzler <sup>3</sup>, Udo Reichl <sup>2,4</sup>, Matthias Franzreb <sup>3</sup>, Erdmann Rapp <sup>2,5,\*</sup> and Lothar Elling <sup>1,\*</sup>

<sup>1</sup> Laboratory for Biomaterials, Institute for Biotechnology and Helmholtz-Institute for Biomedical Engineering, RWTH Aachen University, Pauwelsstraße 20, 52074 Aachen, Germany; [t.fischoeder@biotec.rwth-aachen.de](mailto:t.fischoeder@biotec.rwth-aachen.de)

<sup>2</sup> Max Planck Institute for Dynamics of Complex Technical Systems, Sandtorstraße 1, 39106 Magdeburg, Germany; [cajic@mpi-magdeburg.mpg.de](mailto:cajic@mpi-magdeburg.mpg.de), [grote@mpi-magdeburg.mpg.de](mailto:grote@mpi-magdeburg.mpg.de), [udo.reichl@mpi-magdeburg.mpg.de](mailto:udo.reichl@mpi-magdeburg.mpg.de)

<sup>3</sup> Institute of Functional Interfaces, Karlsruhe Institute of Technology, Karlsruhe, Germany; [raphael.heinzler@kit.edu](mailto:raphael.heinzler@kit.edu), [matthias.franzreb@kit.edu](mailto:matthias.franzreb@kit.edu)

<sup>4</sup> Otto-von-Guericke-University, Chair of Bioprocess Engineering, Universitätsplatz 2, 39106 Magdeburg, Germany

<sup>5</sup> glyXera GmbH, Leipziger Straße 44, 39120 Magdeburg, Germany

<sup>†</sup> These authors contributed equally to this work

<sup>\*</sup> Correspondence: [l.elling@biotec.rwth-aachen.de](mailto:l.elling@biotec.rwth-aachen.de); Tel.: +49-241-80-28350; Fax: +49-241-80-22387  
[rapp@mpi-magdeburg.mpg.de](mailto:rapp@mpi-magdeburg.mpg.de); Tel.: +49-391-6110-314; Fax: +49-391-6110-535

## Nucleotide sugar synthesis

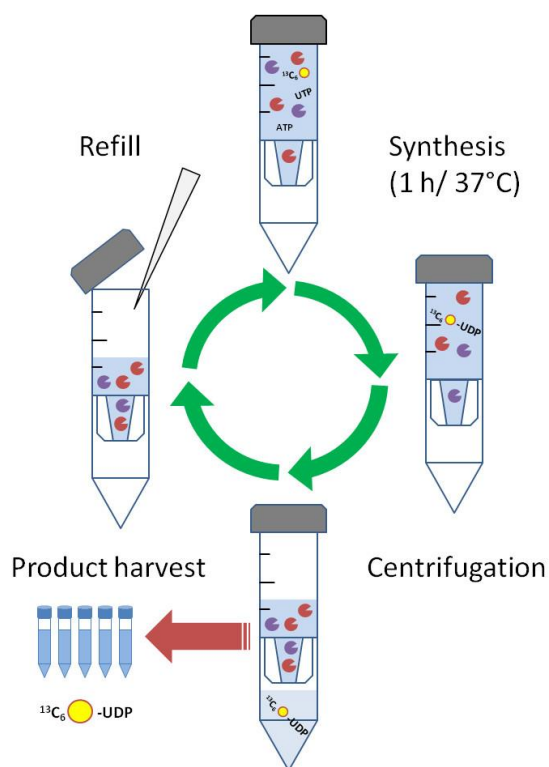

**Scheme S1.** Schematic depiction of the repetitive batch synthesis workflow.

**Table S1.** Calculated space-time-yield and mass base turnover number for the repetitive batch synthesis of compound **3** and **6**.

| compound                                           | amount<br>[ $\mu\text{mol}$ ] | Space-time-yield<br>[ $\text{g/L}\cdot\text{h}$ ] | Mass based turnover number<br>[ $\text{g product/g enzymes}^*$ ] <sup>-1</sup> |
|----------------------------------------------------|-------------------------------|---------------------------------------------------|--------------------------------------------------------------------------------|
| <b>3</b> (UDP-[ <sup>15</sup> N]GlcNAc)            | 200                           | 6.05                                              | 5.3                                                                            |
| <b>6</b> (UDP-[ <sup>13</sup> C <sub>6</sub> ]Gal) | 400                           | 5.65                                              | 8.7                                                                            |

\* consider all involved enzymes

### Capillary electrophoresis with laser laser-induced fluorescence detection (CE-LIF)

Maltose and maltonaose were introduced as internal standards for a suitable migration time alignment, which allows a solid product assignment including the possibility to differentiate between the challenging linkage isomers (Figure S1-S3). Due to co-migration of lacto-*N*-neo-octaose with maltonaose, celloctaose was used instead (Figure S4-S5).

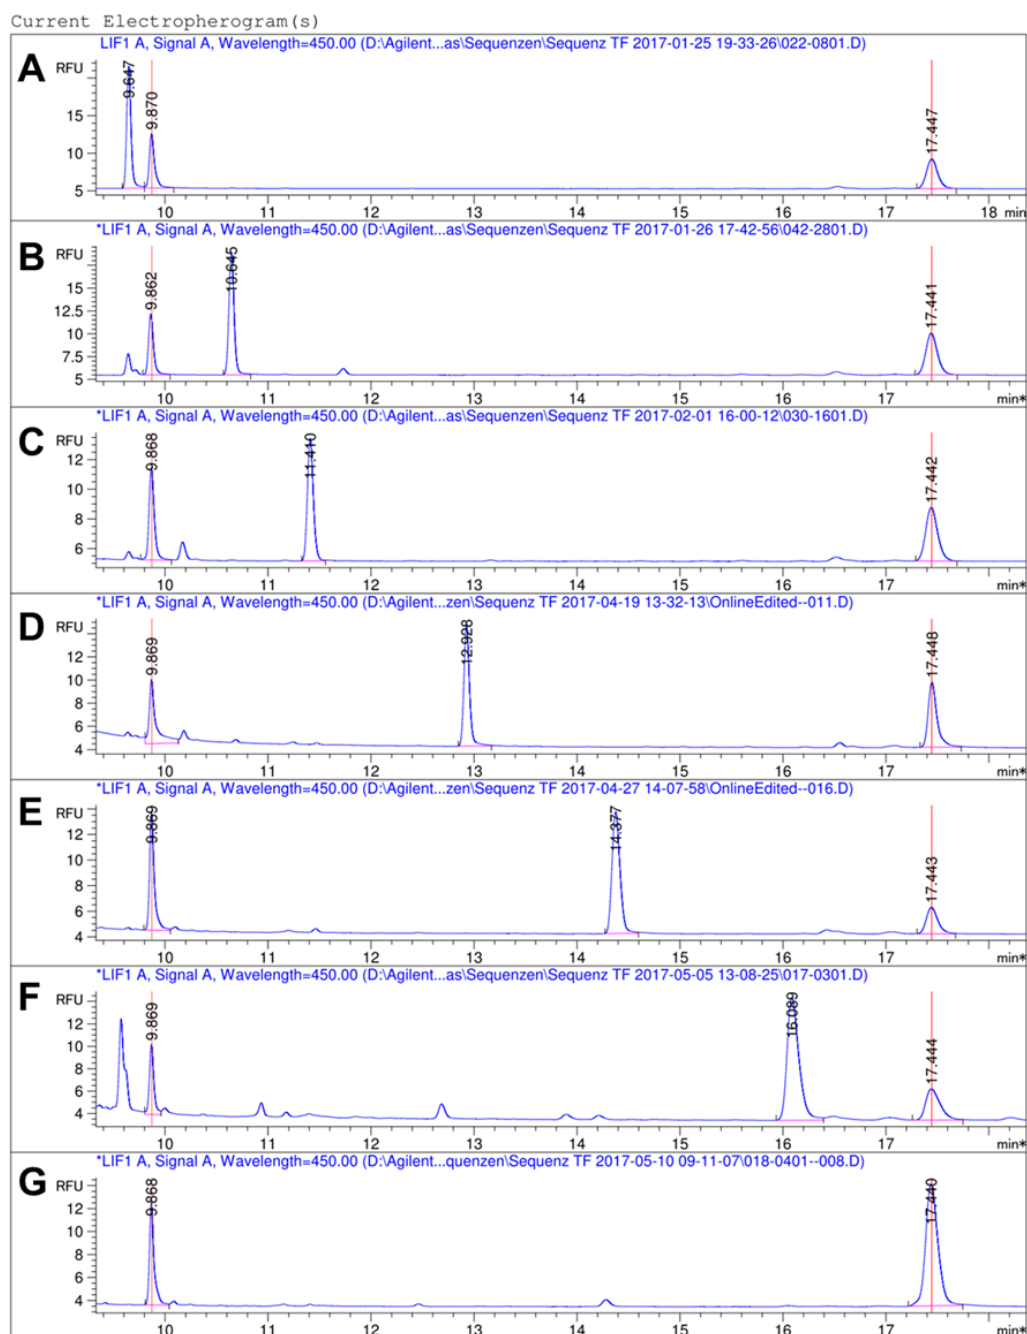

**Figure S1.** CE-LIF (normalized migration time) overlay of the lacto-*N*-neo-type HMOs synthesis, internal standard maltose (9.86), maltonaose (17.44). (A) Lactose, (B) lacto-*N*-neo-triaose, (C) tetraose, (D) pentaose, (E) hexaose (F) heptaose (G) octaose (without maltonaose).

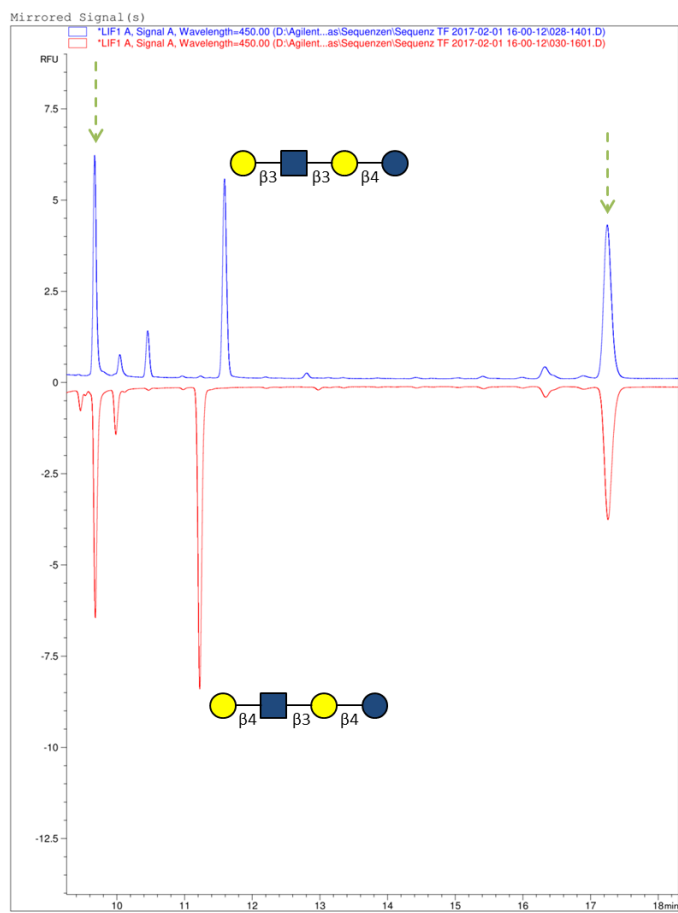

**Figure S2.** CE-LIF separation of lacto-*N*-neo-type and lacto-*N*-type tetraose (normalized migration time), internal normalization standards (green arrow) Maltose (9.86) and maltononaose (17.44). Synthesis of compound **10** (red, lacto-*N*-neo-tetraose, Gal(β1,4)GlcNAc(β1,3)Gal(β1,4)Glc) and compound **20** (blue, lacto-*N*-tetraose, Gal(β1,3)GlcNAc(β1,3)Gal(β1,4)Glc).

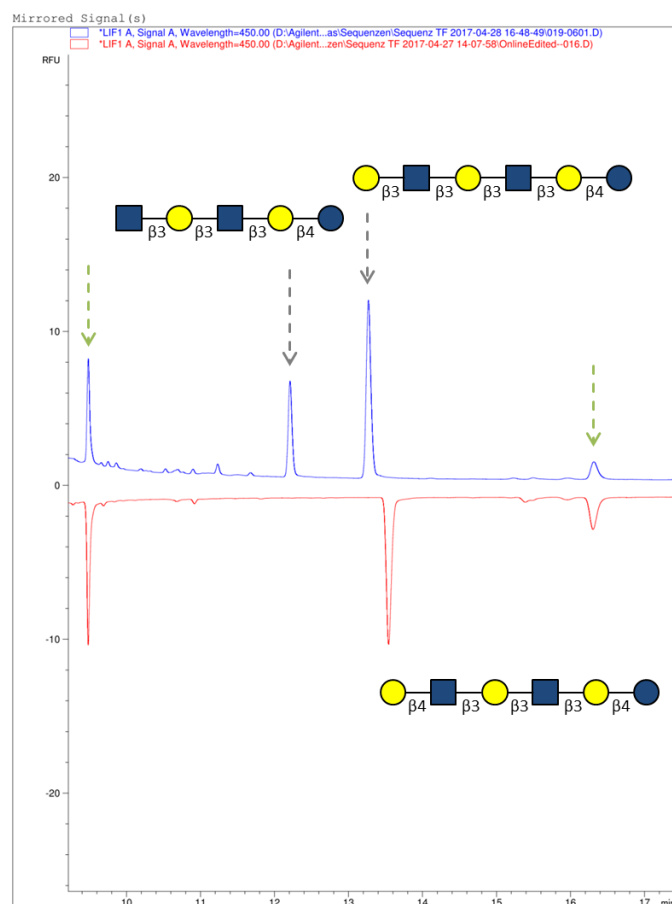

**Figure S3.** CE-LIF separation of lacto-*N*-neo-type and lacto-*N*-type hexaose (normalized migration time), internal normalization standards (green arrow) maltose (9.86) and maltononaoise (16.6). Synthesis of compound **14** (red, lacto-*N*-neo-hexaose, Gal(β1,4)GlcNAc(β1,3)Gal(β1,4)GlcNAc(β1,3)Gal(β1,4)Glc) and compound **22** (blue, lacto-*N*-hexaose, Gal(β1,3)GlcNAc(β1,3)Gal(β1,4)GlcNAc(β1,3)Gal(β1,4)Glc).

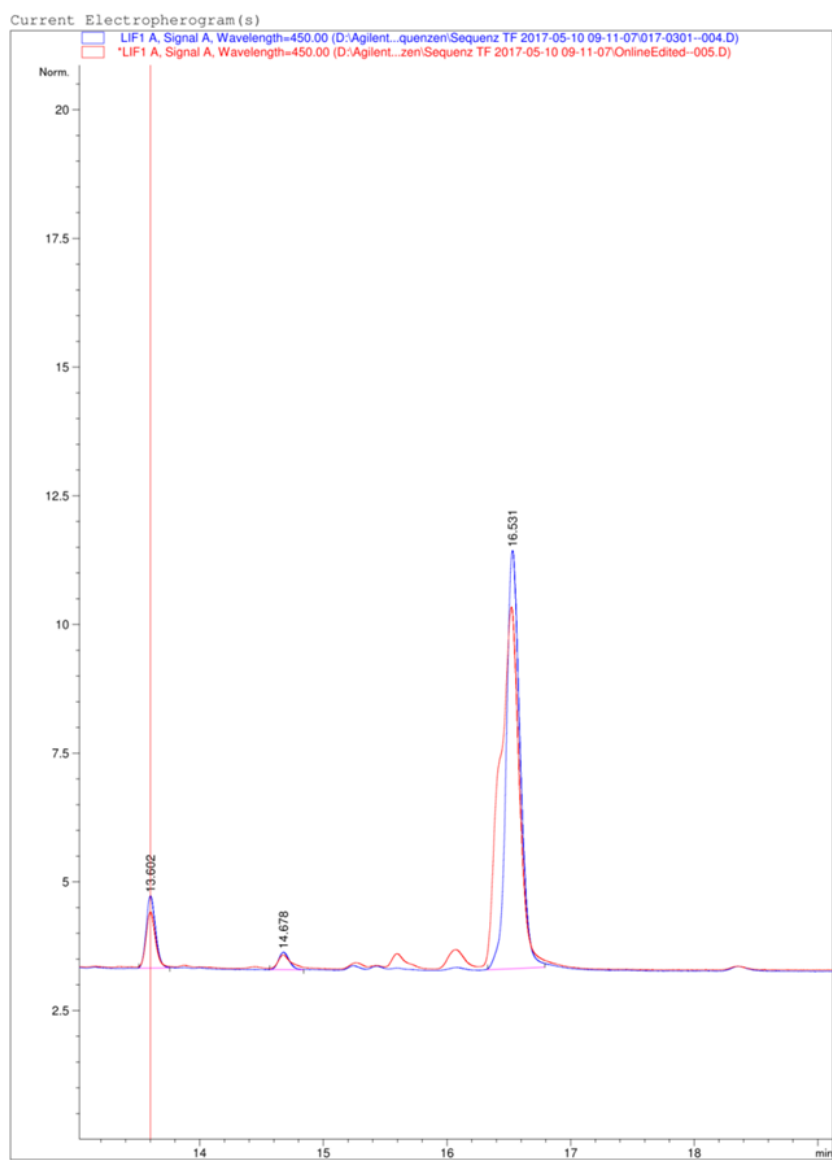

**Figure S4.** CE-LIF (normalized migration time), internal standard cellooctaose (13.60). Maltonaose (red, 16.53), lacto-*N*-neo-octaose (blue, 16.53).

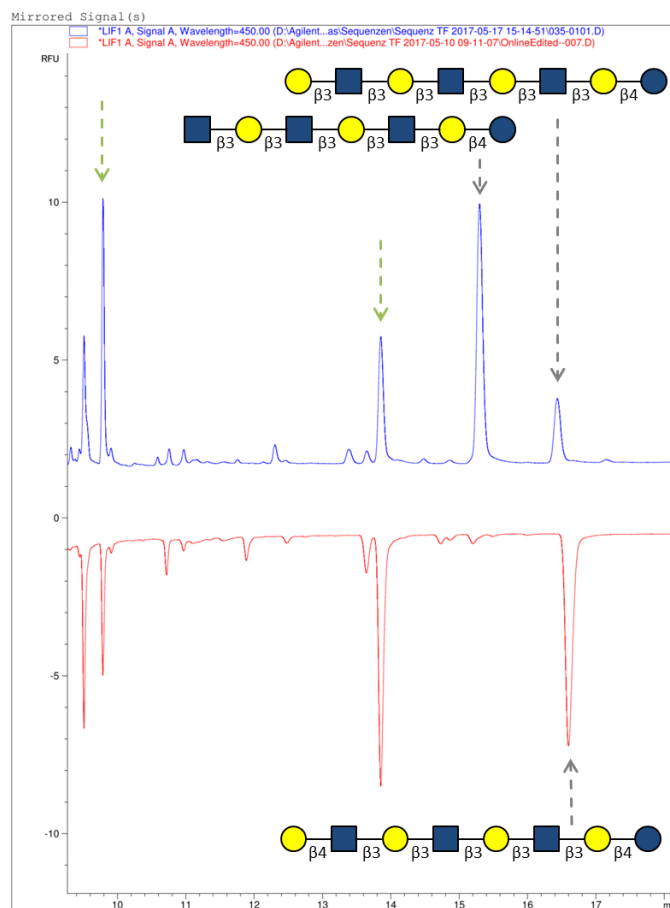

**Figure S5.** CE-LIF separation of lacto-*N*-neo-type and lacto-*N*-type octaose (normalized migration time), internal normalization standards (green arrow) maltose (9.86) and cellobiose (13.92). Synthesis of compound **18** (red, lacto-*N*-neo-octaose, Gal( $\beta$ 1,4)GlcNAc( $\beta$ 1,3)Gal( $\beta$ 1,4)GlcNAc( $\beta$ 1,3)Gal( $\beta$ 1,4)Glc) and compound **24** (blue, lacto-*N*-octaose, Gal( $\beta$ 1,3)GlcNAc( $\beta$ 1,3)Gal( $\beta$ 1,4)GlcNAc( $\beta$ 1,3)Gal( $\beta$ 1,4)Glc).

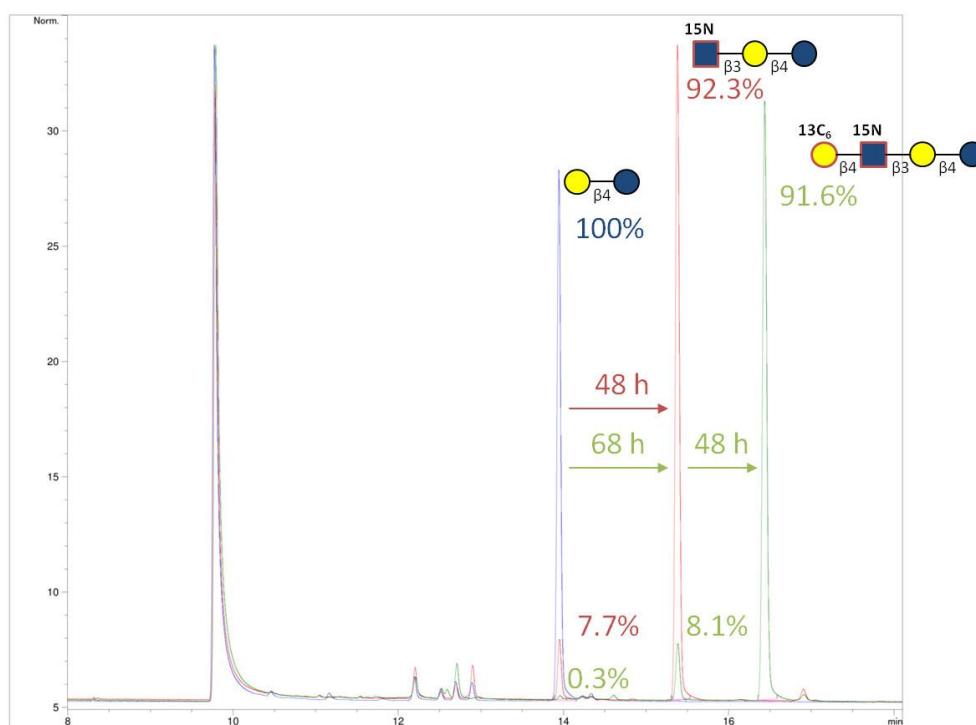

**Figure S6.** CE-LIF overlay of the reaction monitoring after respective 48 hours, (normalized migration time) EOF (9.86), maltononaose (not shown), sequential synthesis of [<sup>15</sup>N/<sup>13</sup>C<sub>6</sub>]lacto-*N*-neo-tetraose, [<sup>13</sup>C<sub>6</sub>]Gal(β1,4)[<sup>15</sup>N]GlcNAc(β1,3)Gal(β1,4)Glc. The total yield was calculated from the relative conversion observed within the final analysis (green).



### Mass spectrometry (ESI-MS)

Regarding the product evaluation, we have to notice that some ESI-MS spectra for the linear long-chained structures show an unfavorable signal noise to ratio. Therefore, the more sensitive and more high-grade MALDI-TOF-MS measurements of the same samples were additionally taken into account. The unfavorable signal noise to ratio of the ESI-MS HMOS analysis is may caused by the challenging isomerization properties of the analyzed linear long-chained structures which is crucially improved by the MALDI-TOF-MS technique. Critical ESI-MS spectra were supplemented with spectra scans.

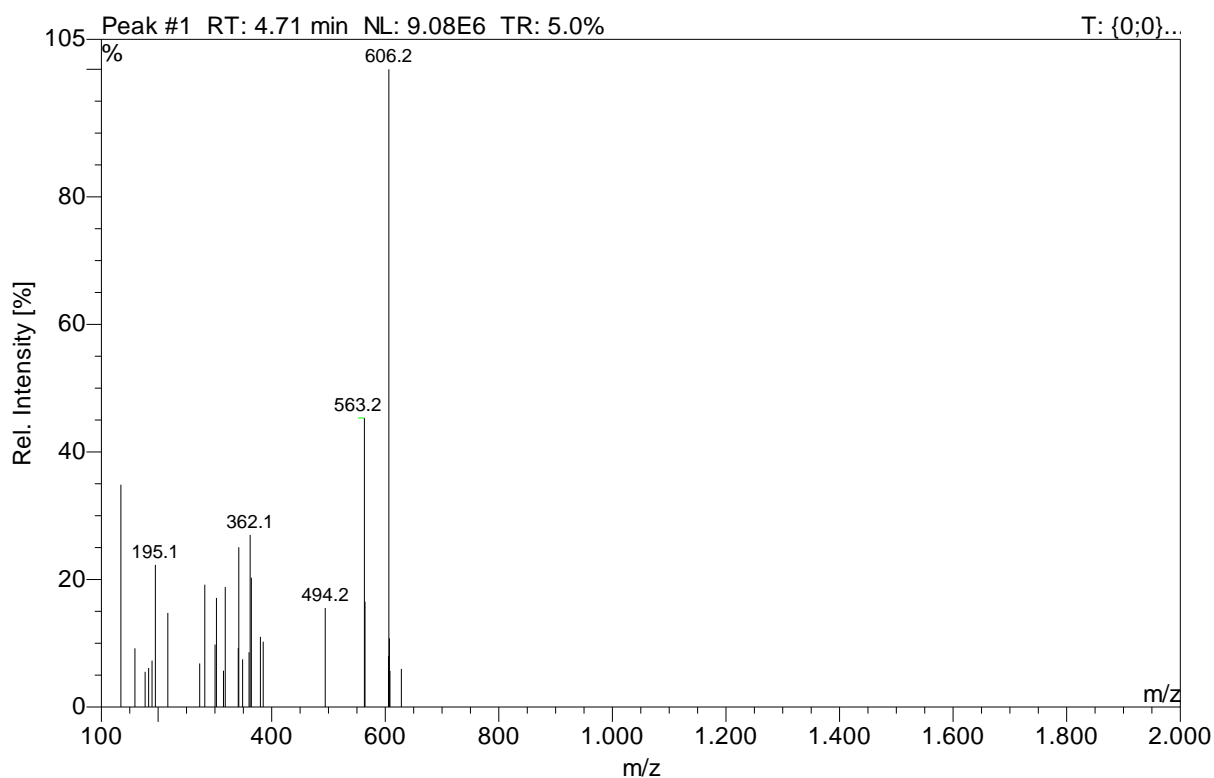

**Figure MS1.** Mass spectrum (ESI-) of UDP-*N*-acetyl-glucosamine ([M-H]<sup>-</sup>, *m/z* 606.2).

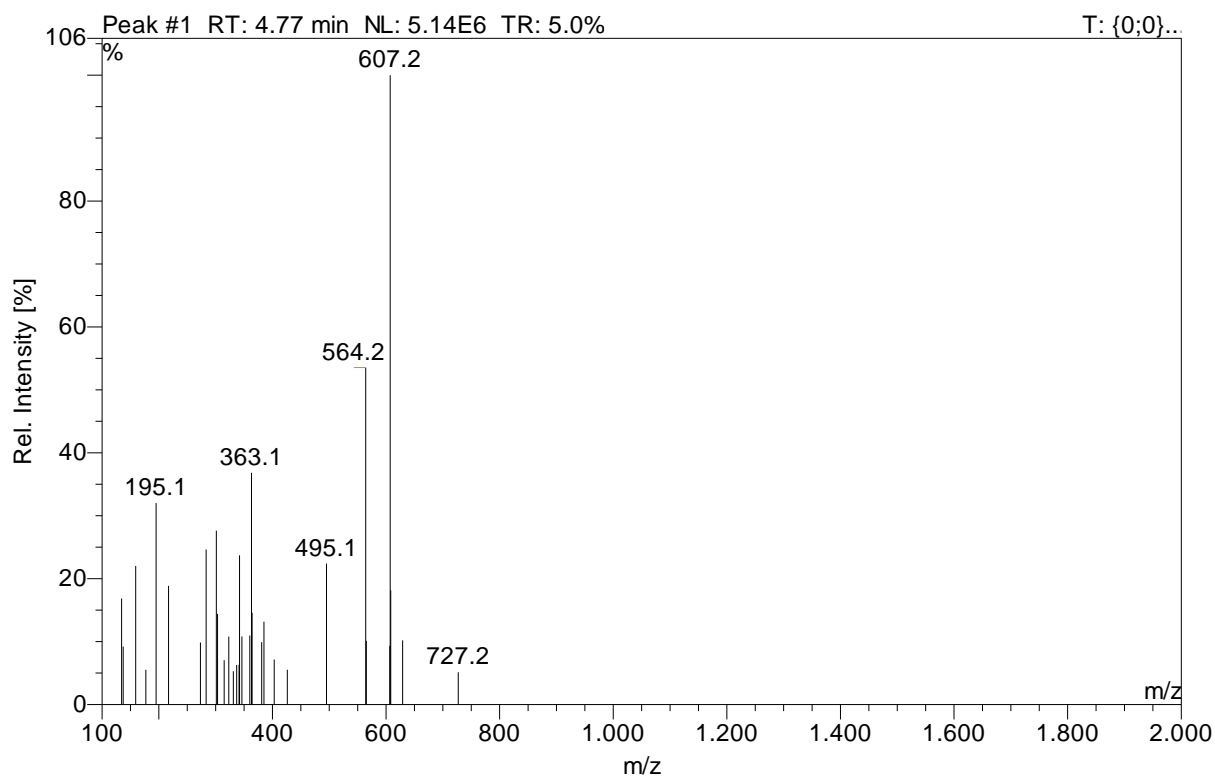

**Figure MS2.** Mass spectrum (ESI-) of UDP-*N*-acetyl-<sup>15</sup>N]glucosamine (compound 6) ([M-H]<sup>-</sup>, *m/z* 607.2).

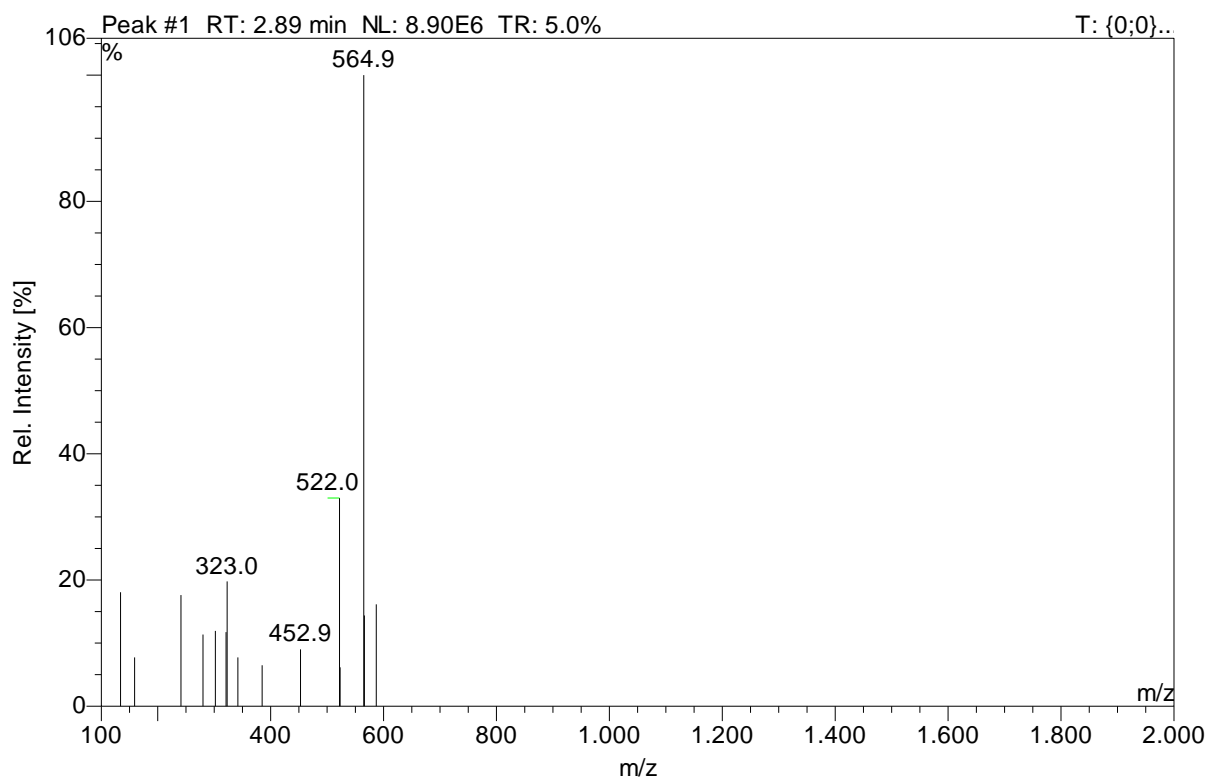

**Figure MS3.** Mass spectrum (ESI-) of UDP-galactose ([M-H]<sup>-</sup>, *m/z* 564.9).

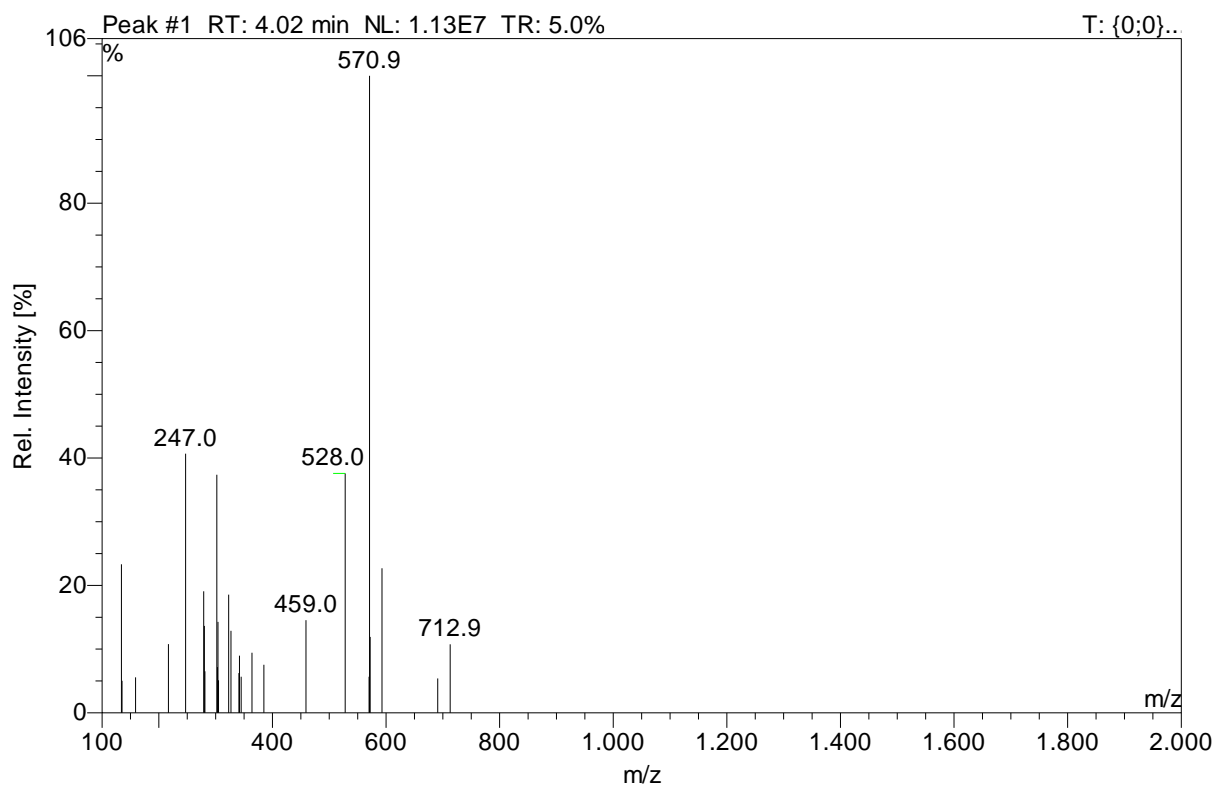

**Figure MS4.** Mass spectrum (ESI-) of UDP- $^{13}\text{C}_6$ galactose 3 ([M-H] $^-$ ,  $m/z$  570.9).

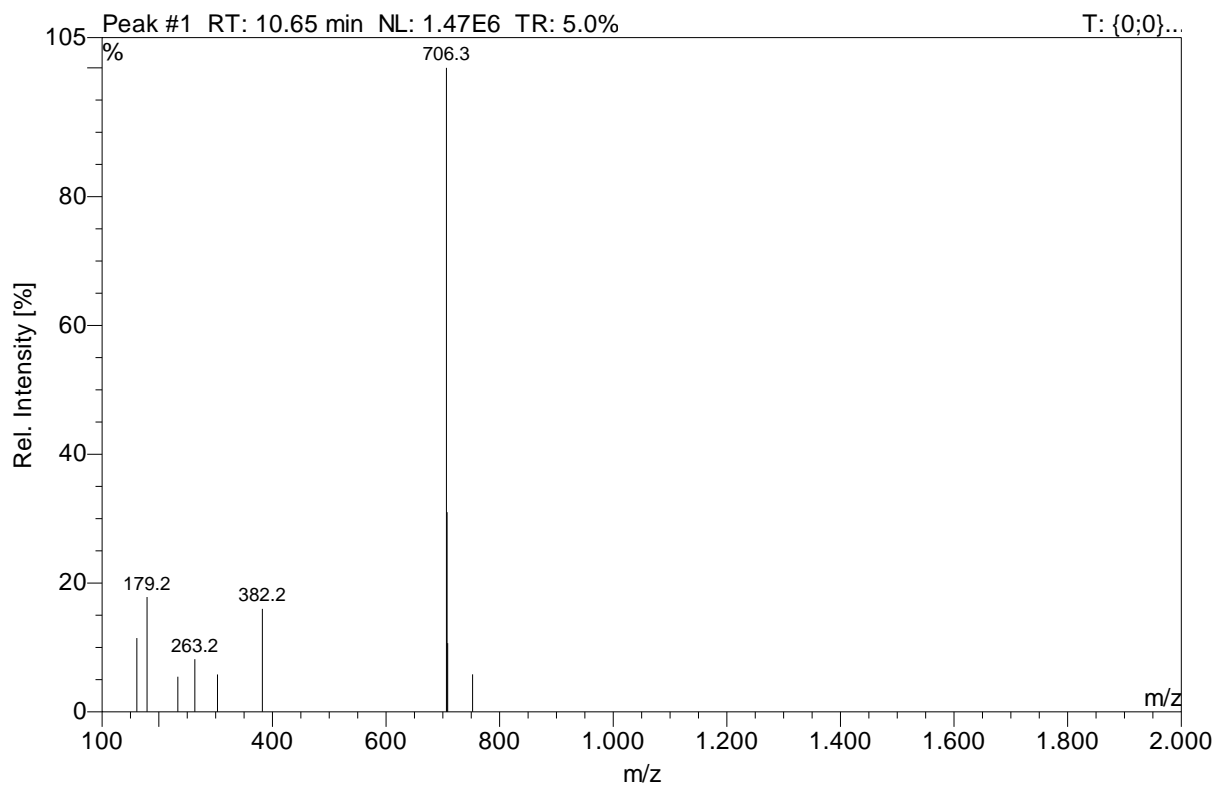

**Figure MS5.** Mass spectrum (ESI-) of lacto-*N*-tetraose 19, Gal( $\beta$ 1,3)GlcNAc( $\beta$ 1,3)Gal( $\beta$ 1,4)Glc ([M-H] $^-$ ,  $m/z$  706.3).

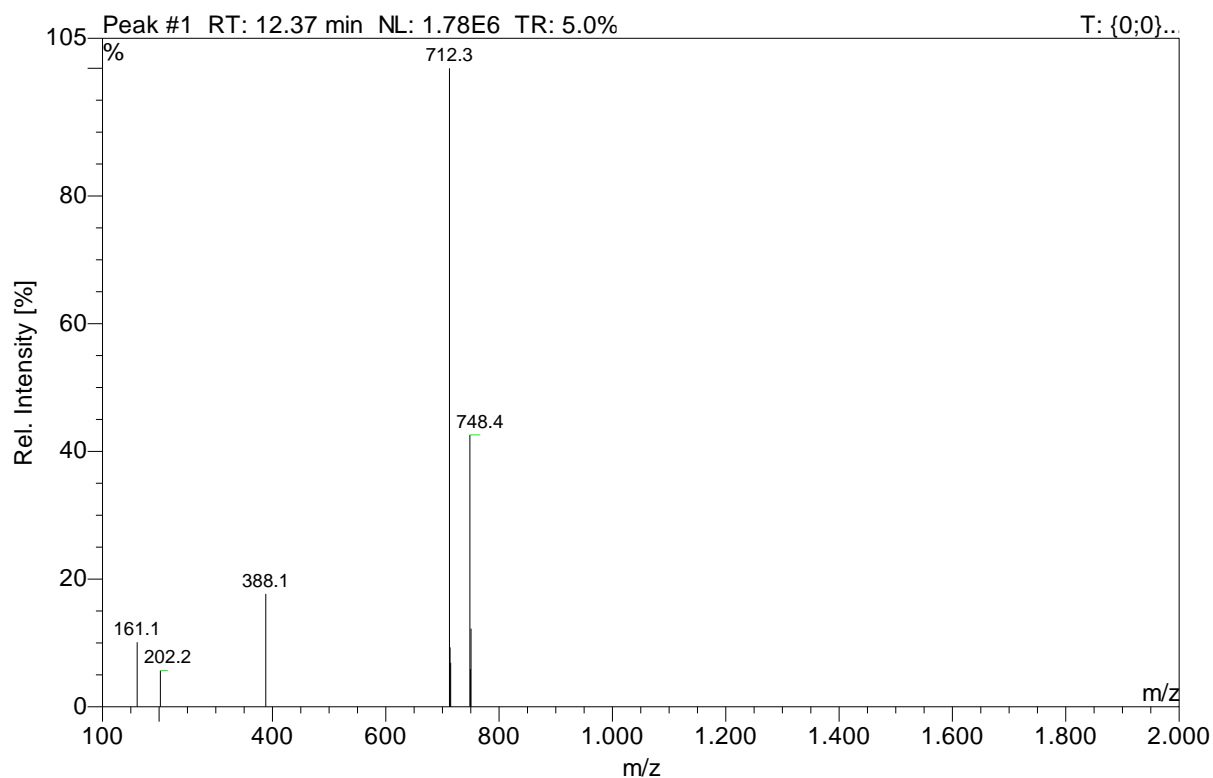

**Figure MS6.** Mass spectrum (ESI-) of  $[^{13}\text{C}_6]$ lacto-*N*-tetraose **20**,  $[^{13}\text{C}_6]\text{Gal}(\beta 1,3)\text{GlcNAc}(\beta 1,3)\text{Gal}(\beta 1,4)\text{Glc}$  ( $[\text{M}-\text{H}]^-$ ,  $m/z$  712.3;  $[\text{M}+\text{Cl}]^-$ ,  $m/z$  748.4).

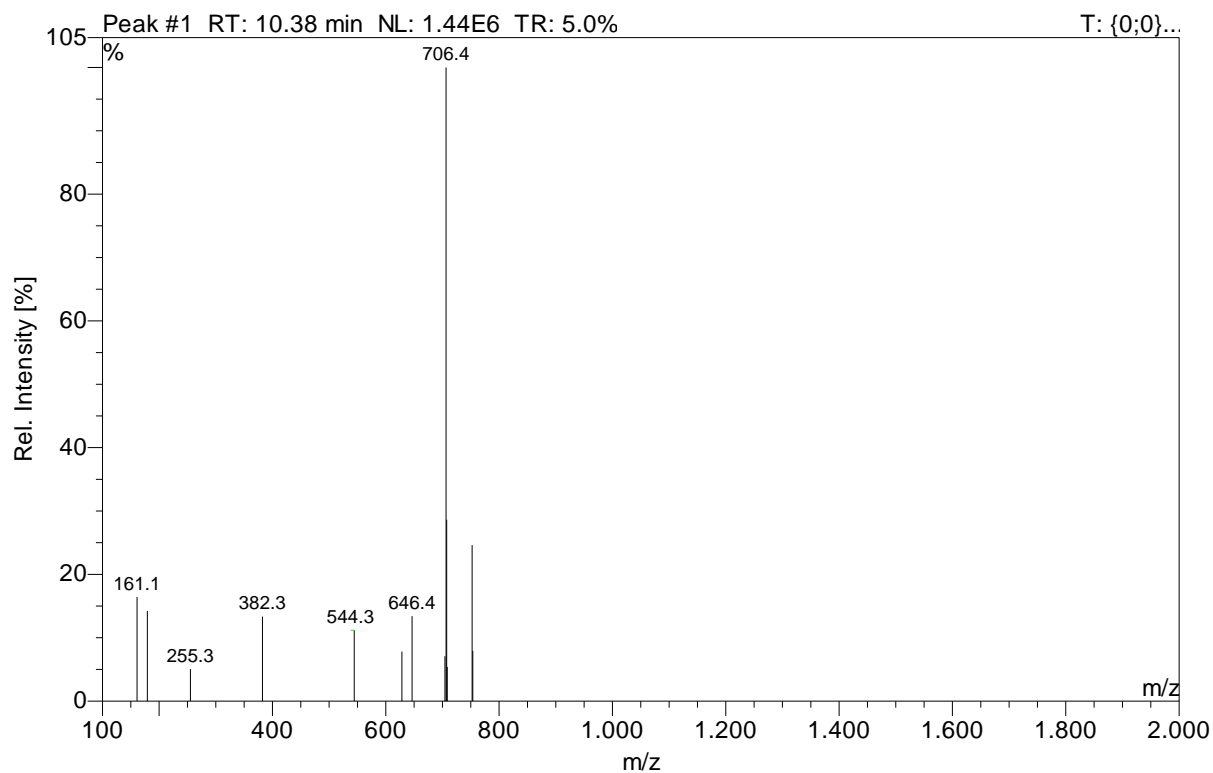

**Figure MS7.** Mass spectrum (ESI-) of lacto-*N*-neo-tetraose **9**,  $\text{Gal}(\beta 1,4)\text{GlcNAc}(\beta 1,3)\text{Gal}(\beta 1,4)\text{Glc}$  ( $[\text{M}-\text{H}]^-$ ,  $m/z$  706.4).

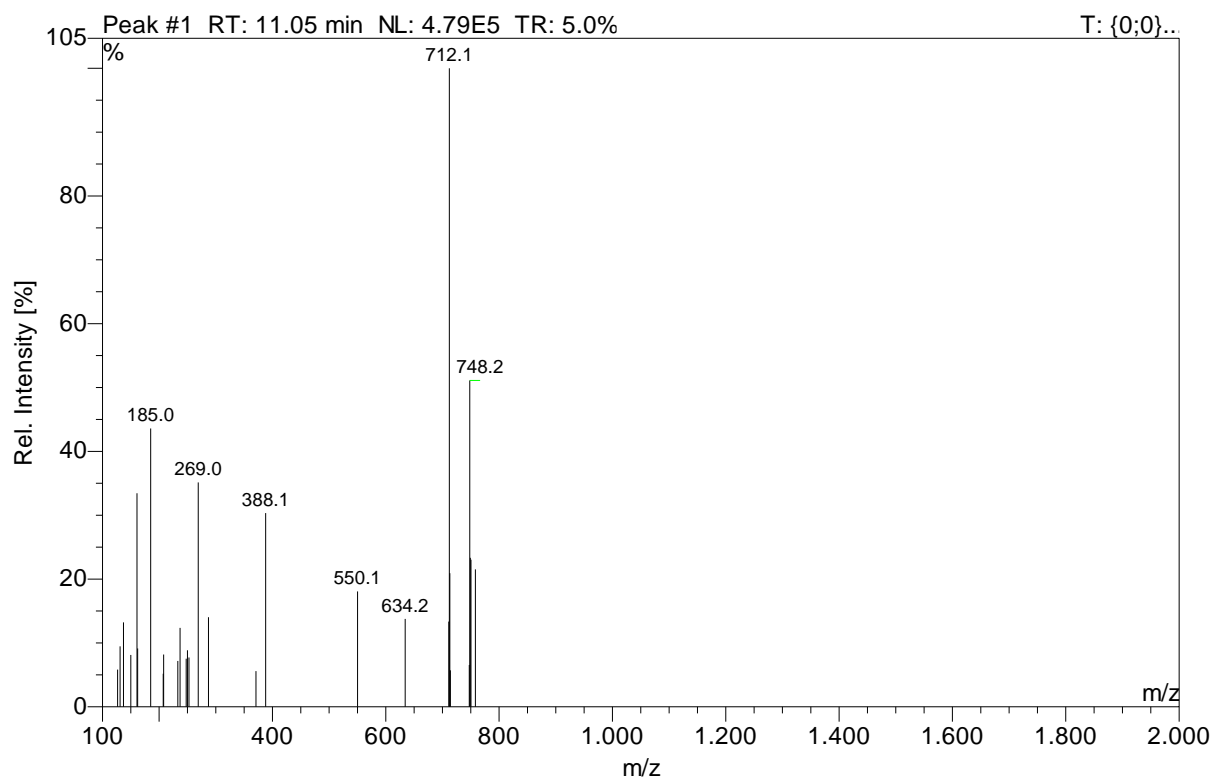

**Figure MS8.** Mass spectrum (ESI-) of [ $^{13}\text{C}_6$ ]lacto-*N*-neo-tetraose **10**, [ $^{13}\text{C}_6$ ]Gal( $\beta$ 1,4)GlcNAc( $\beta$ 1,3)Gal( $\beta$ 1,4)Glc ([M-H] $^-$ ,  $m/z$  712.1; [M+Cl] $^-$ ,  $m/z$  748.2).

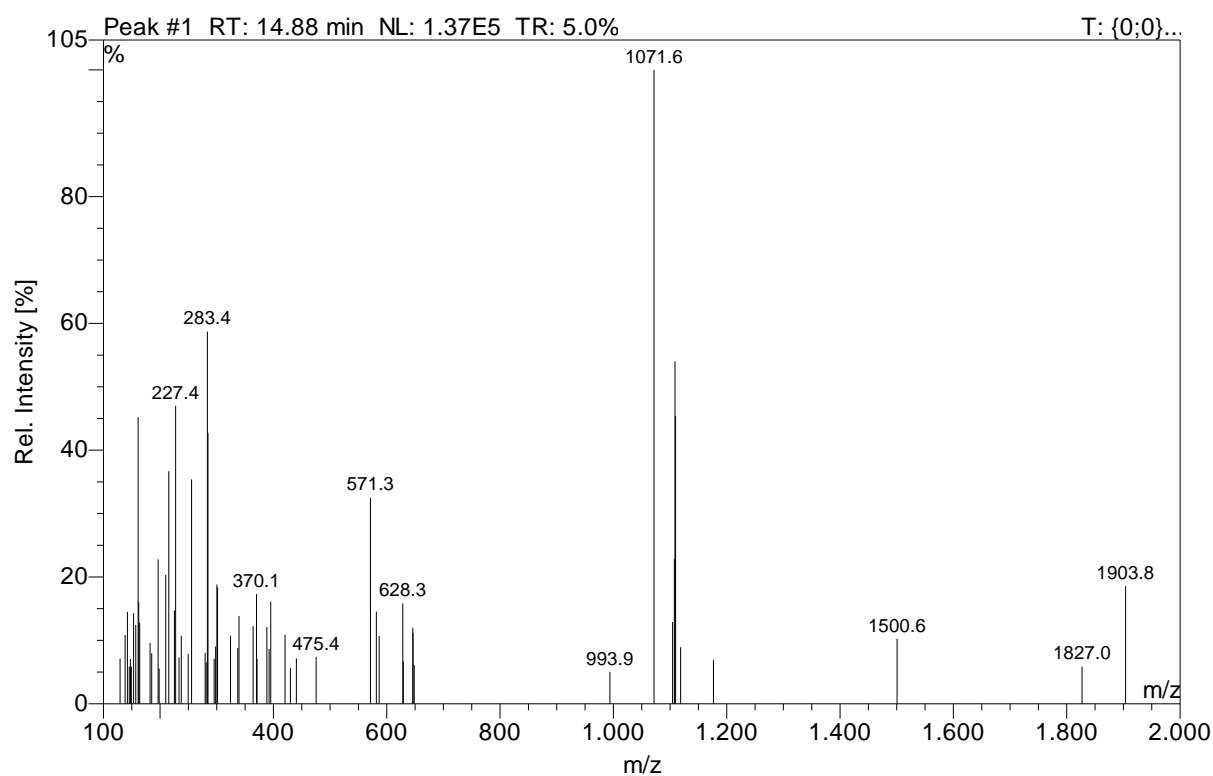

**Figure MS9.** Mass spectrum (ESI-) of lacto-*N*-hexaose **21**, Gal( $\beta$ 1,3)GlcNAc( $\beta$ 1,3)Gal( $\beta$ 1,4)GlcNAc( $\beta$ 1,3)Gal( $\beta$ 1,4)Glc ([M-H] $^-$ ,  $m/z$  1071.6).

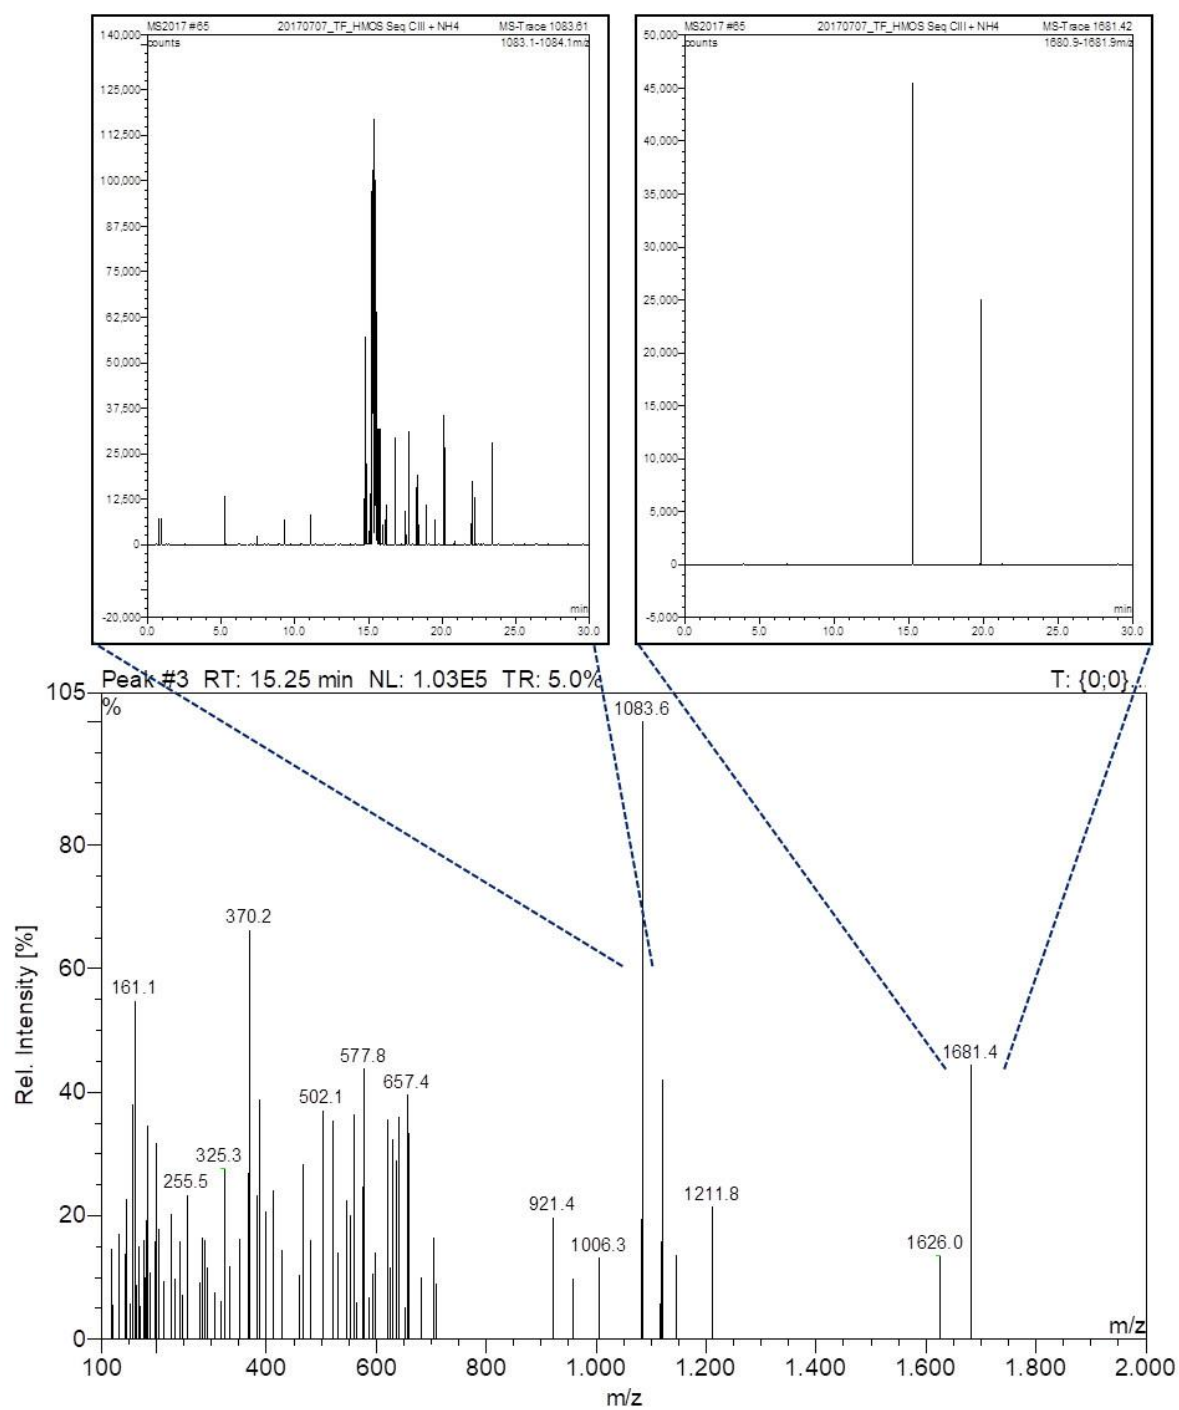

**Figure MS10.** Mass spectrum (ESI-) of [ $^{13}\text{C}_6$ ]lacto-*N*-hexaose **22**, [ $^{13}\text{C}_6$ ]Gal( $\beta$ 1,3)GlcNAc( $\beta$ 1,3) [ $^{13}\text{C}_6$ ]Gal( $\beta$ 1,4)GlcNAc( $\beta$ 1,3)Gal( $\beta$ 1,4)Glc ([M-H] $^-$ ,  $m/z$  1083.6).

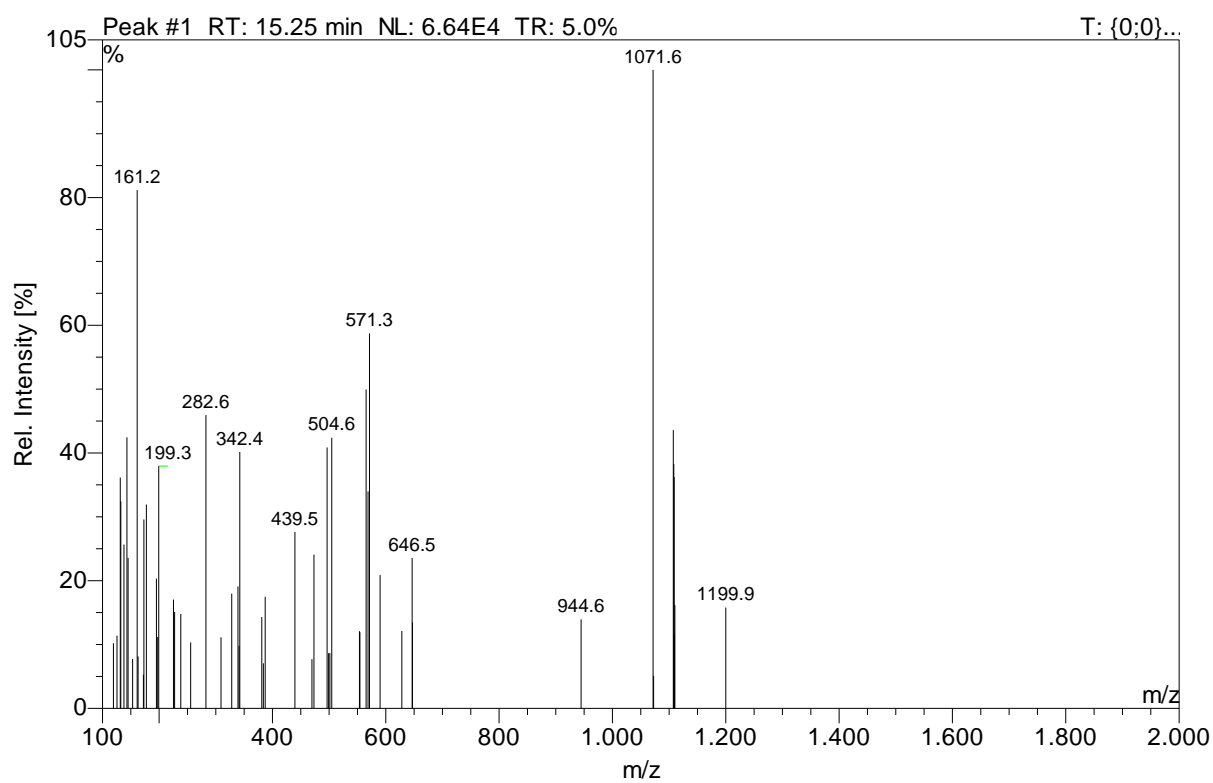

**Figure MS11.** Mass spectrum (ESI-) of lacto-*N*-neo-hexaose **13**, Gal( $\beta$ 1,4)GlcNAc( $\beta$ 1,3)Gal( $\beta$ 1,4)GlcNAc( $\beta$ 1,3)Gal( $\beta$ 1,4)Glc ([M-H]<sup>-</sup>,  $m/z$  1071.6).

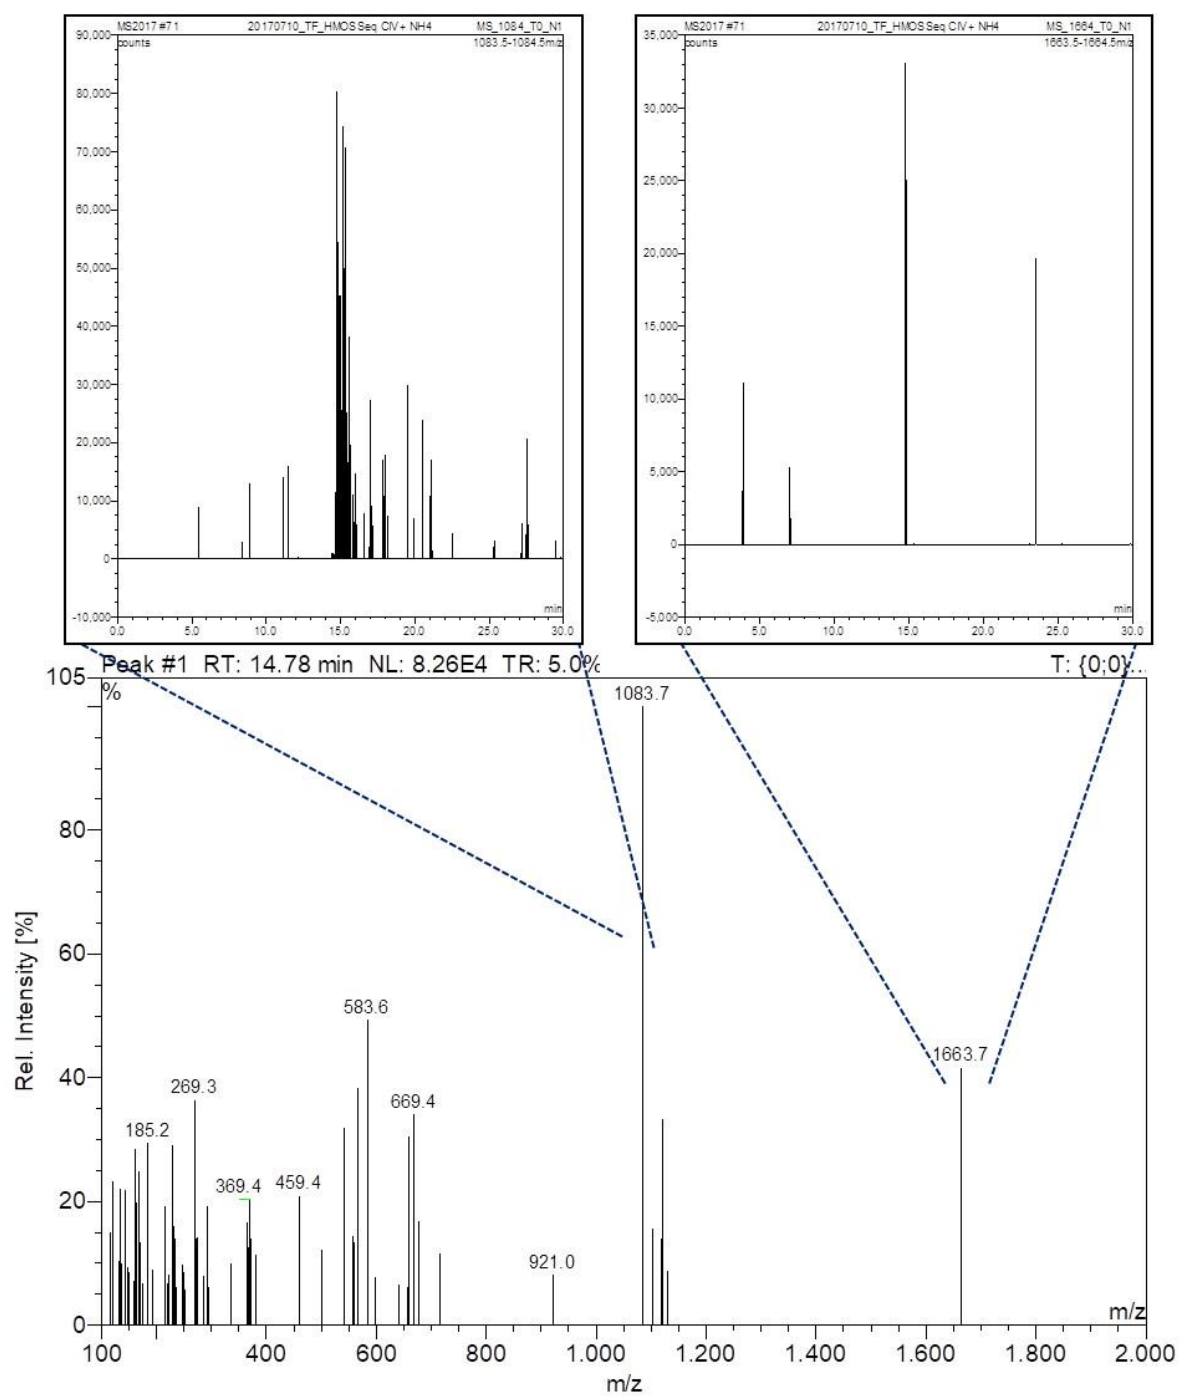

**Figure MS12.** Mass spectrum (ESI-) of  $[^{13}\text{C}_6]$ lacto-*N*-neo-hexaose **14**,  $[^{13}\text{C}_6]$ Gal( $\beta$ 1,4)GlcNAc( $\beta$ 1,3)  $[^{13}\text{C}_6]$ Gal( $\beta$ 1,4)GlcNAc( $\beta$ 1,3)Gal( $\beta$ 1,4)Glc ([M-H] $^-$ ),  $m/z$  1083.7).



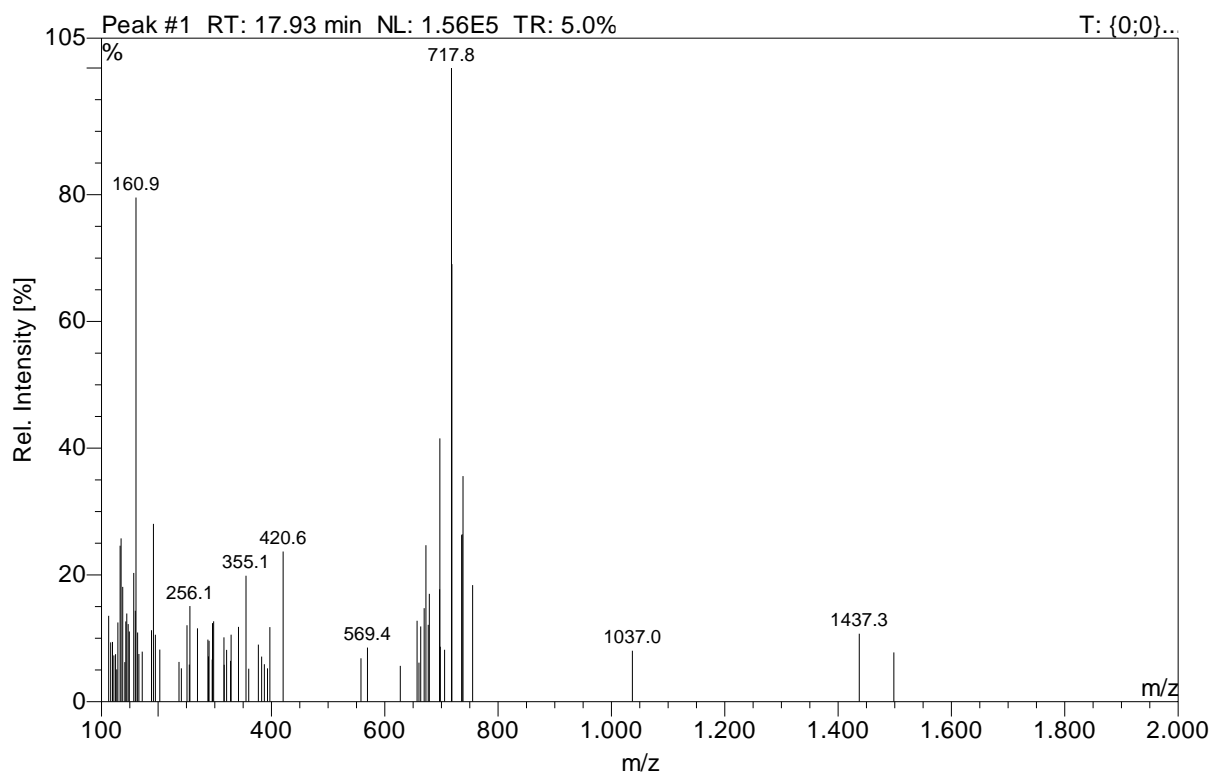

**Figure MS13.** Mass spectrum (ESI-) of lacto-*N*-octaose **23**, Gal( $\beta$ 1,3)GlcNAc( $\beta$ 1,3)Gal( $\beta$ 1,4)GlcNAc( $\beta$ 1,3)Gal( $\beta$ 1,4)GlcNAc( $\beta$ 1,3)Gal( $\beta$ 1,4)Glc ([M-2H]<sup>-</sup>, *m/z* 717.8, [M-H]<sup>-</sup>, *m/z* 1437.3).

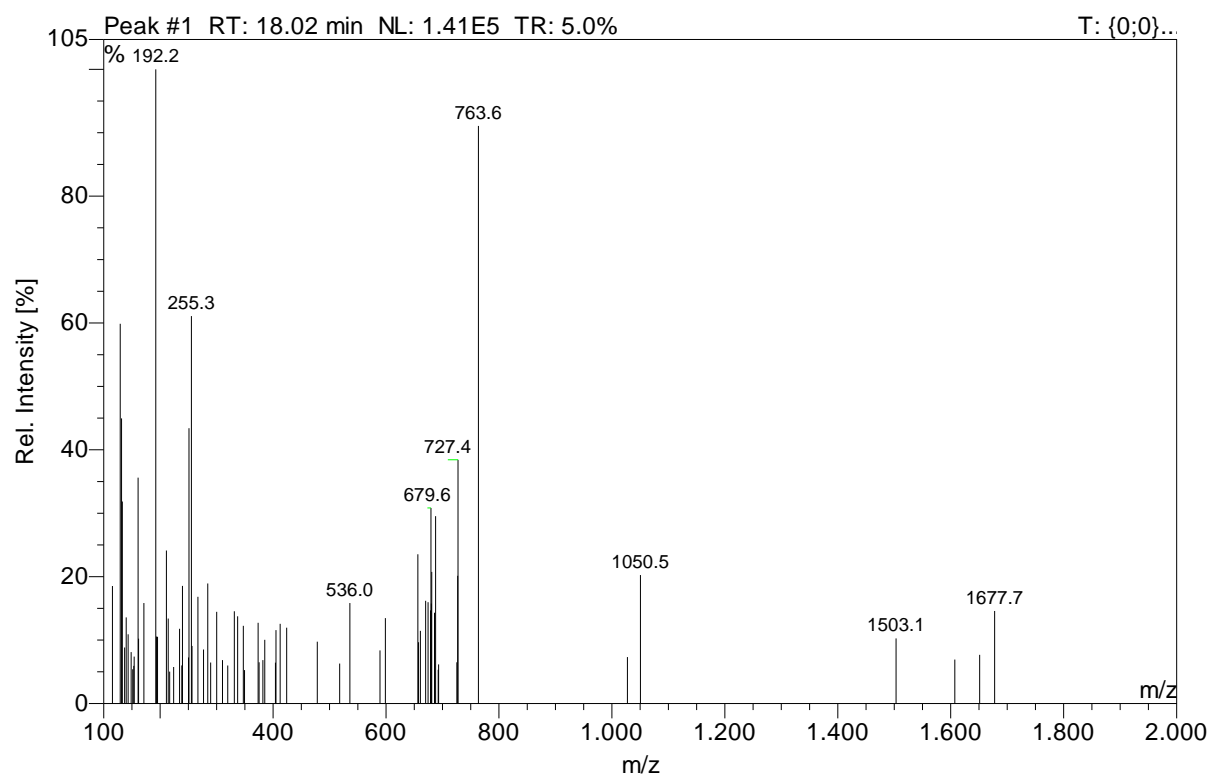

**Figure MS14.** Mass spectrum (ESI-) of [<sup>13</sup>C<sub>6</sub>]lacto-*N*-octaose **24**, [<sup>13</sup>C<sub>6</sub>]Gal( $\beta$ 1,3)GlcNAc( $\beta$ 1,3)[<sup>13</sup>C<sub>6</sub>]Gal( $\beta$ 1,4)GlcNAc( $\beta$ 1,3)[<sup>13</sup>C<sub>6</sub>]Gal( $\beta$ 1,4)GlcNAc( $\beta$ 1,3)Gal( $\beta$ 1,4)Glc ([M-2H]<sup>-</sup>, *m/z* 727.1, [M-2H+Cl]<sup>-</sup>, *m/z* 748.4).

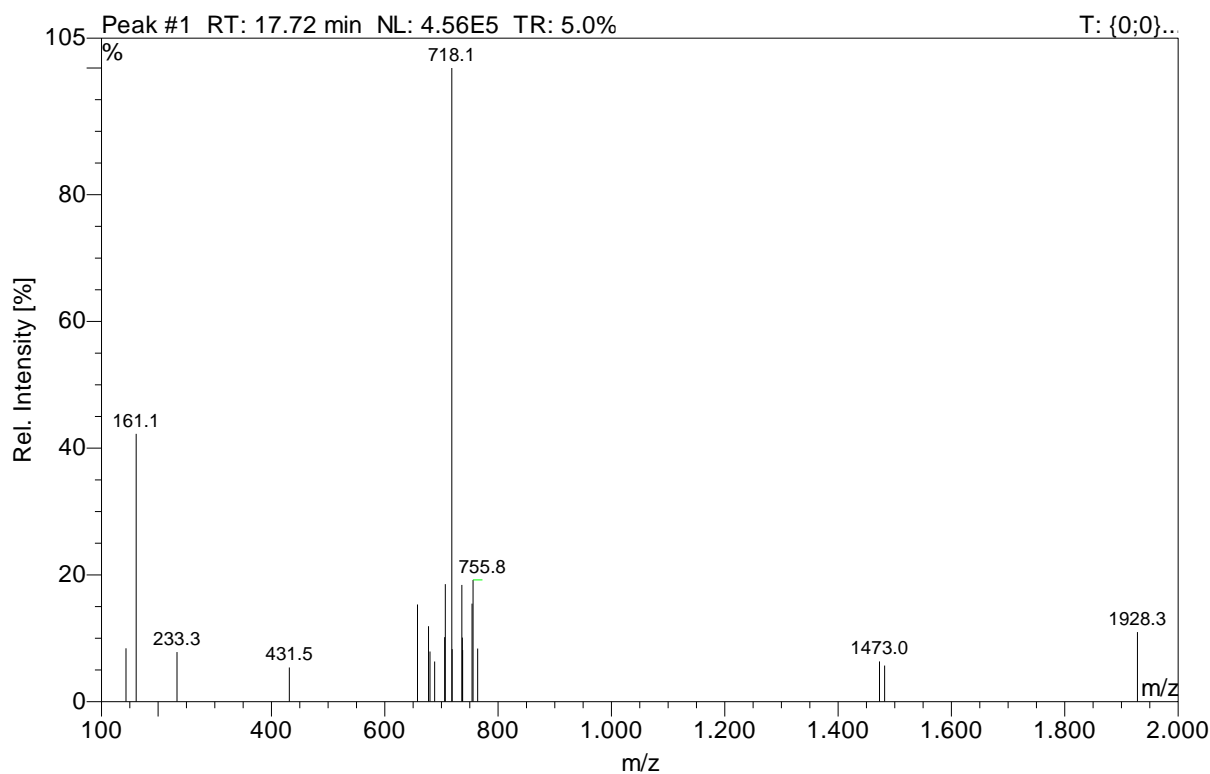

**Figure MS15.** Mass spectrum (ESI-) of lacto-*N*-neo-octaose **17**, [ $^{13}\text{C}_6$ ]Gal( $\beta$ 1,4)GlcNAc( $\beta$ 1,3) [ $^{13}\text{C}_6$ ]Gal( $\beta$ 1,4)GlcNAc( $\beta$ 1,3)[ $^{13}\text{C}_6$ ]Gal( $\beta$ 1,4)GlcNAc( $\beta$ 1,3)Gal( $\beta$ 1,4)Glc ([M-2H] $^-$ ,  $m/z$  718.1, [M+K-2H] $^-$ ,  $m/z$  1473.0).

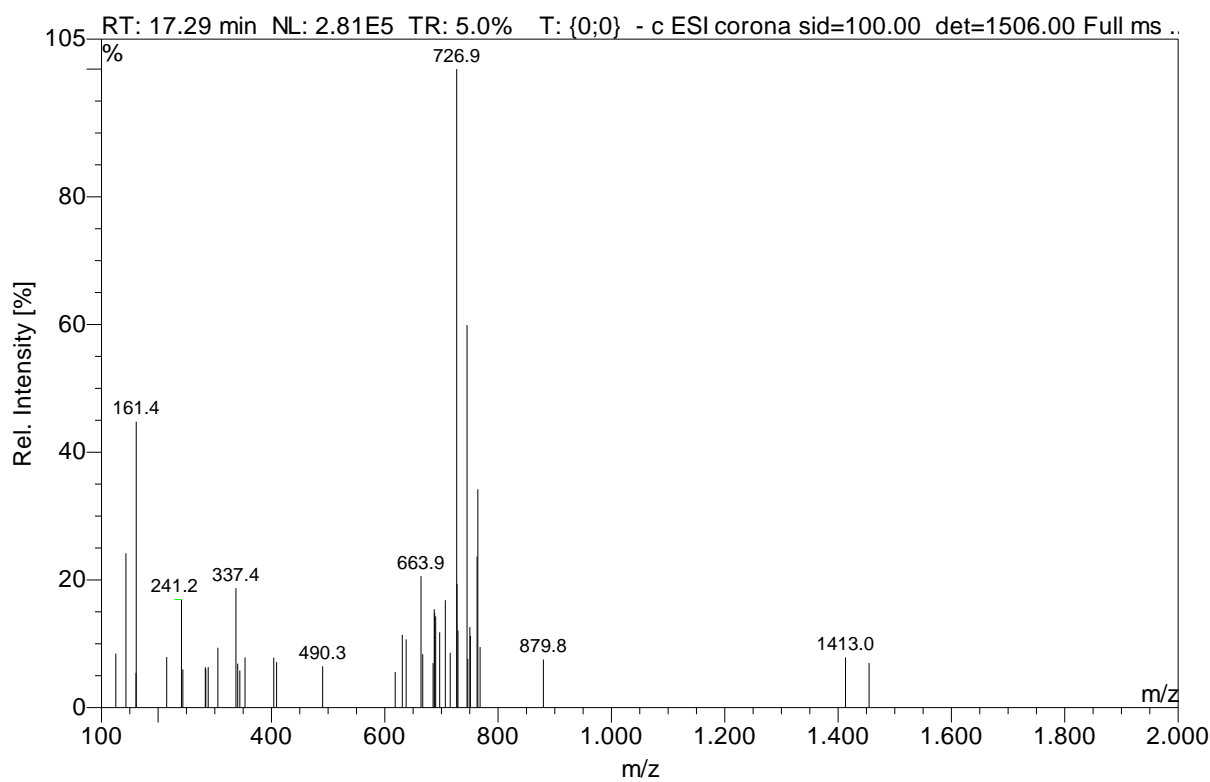

**Figure MS16.** Mass spectrum (ESI-) of [ $^{13}\text{C}_6$ ]lacto-*N*-neo-octaose **18**, [ $^{13}\text{C}_6$ ]Gal( $\beta$ 1,4)GlcNAc( $\beta$ 1,3) [ $^{13}\text{C}_6$ ]Gal( $\beta$ 1,4)GlcNAc( $\beta$ 1,3)[ $^{13}\text{C}_6$ ]Gal( $\beta$ 1,4)Glc ([M-2H] $^-$ ,  $m/z$  726.9).

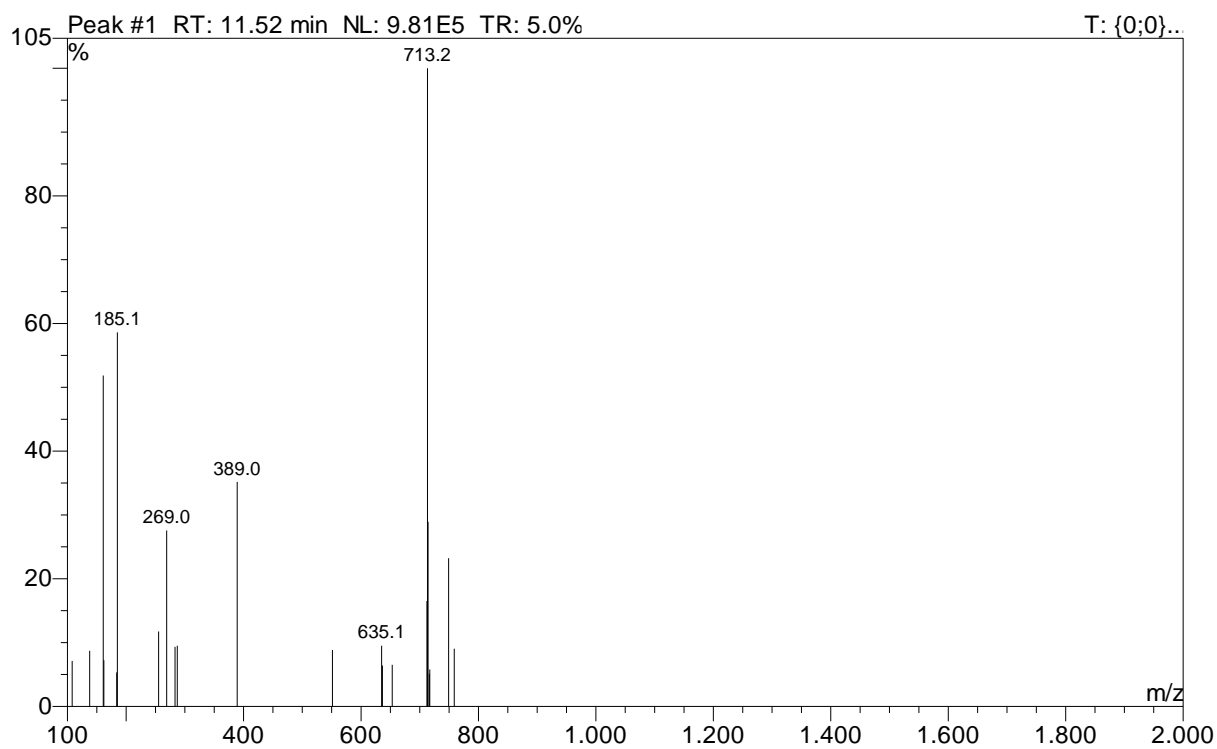

**Figure MS17.** Mass spectrum (ESI-) of  $[^{15}\text{N}/^{13}\text{C}_6]$ lacto-*N*-neo-tetraose 25,  $[^{13}\text{C}_6]$ Gal( $\beta$ 1,4) $[^{15}\text{N}]$ GlcNAc( $\beta$ 1,3)Gal( $\beta$ 1,4)Glc ( $[M-2H]^-$ ,  $m/z$  713.2).

## Mass spectrometry (MALDI-TOF-MS)

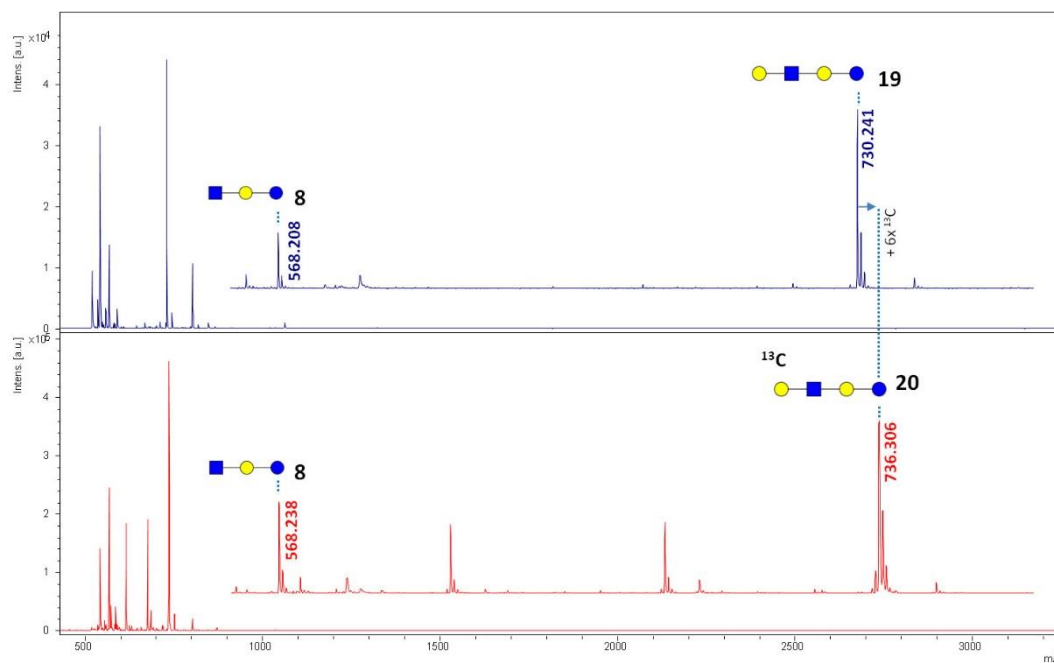

**Figure MTS1.** Mass spectrum (MALDI-TOF-MS) of compound 8 lacto-*N*-triaose II,  $\text{GlcNAc}(\beta 1,3)\text{Gal}(\beta 1,4)\text{Glc}$  ( $[\text{M}+\text{Na}]^+$ ,  $m/z$  568.2), synthesis product 19 lacto-*N*-tetraose,  $\text{Gal}(\beta 1,3)\text{GlcNAc}(\beta 1,3)\text{Gal}(\beta 1,4)\text{Glc}$  ( $[\text{M}+\text{Na}]^+$ ,  $m/z$  730.2) and 20  $[^{13}\text{C}_6]$ lacto-*N*-tetraose,  $[^{13}\text{C}_6]\text{Gal}(\beta 1,3)\text{GlcNAc}(\beta 1,3)\text{Gal}(\beta 1,4)\text{Glc}$  ( $[\text{M}+\text{Na}]^+$ ,  $m/z$  736.3).

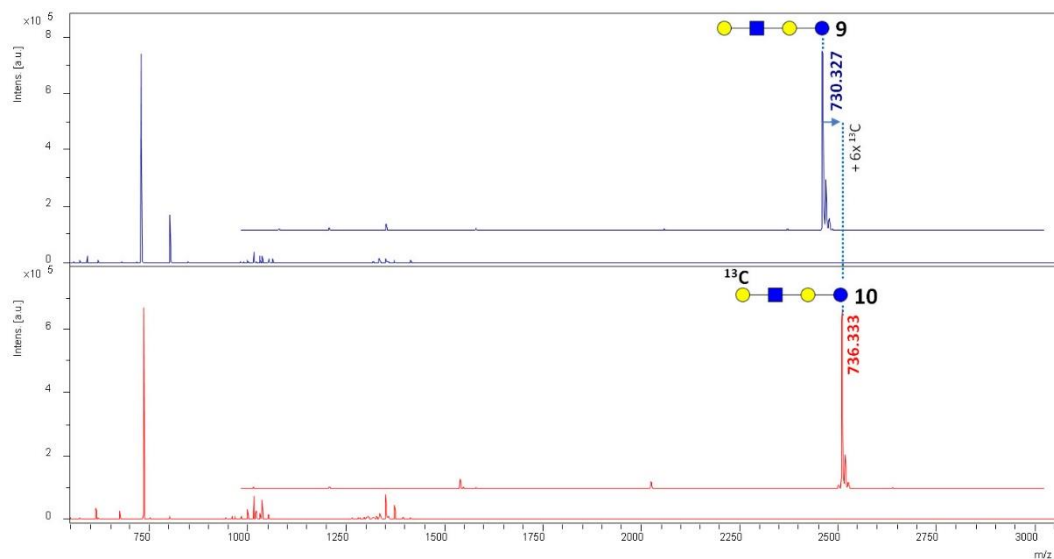

**Figure MTS2.** Mass spectrum (MALDI-TOF-MS) of compound 9 lacto-*N*-neo-tetraose,  $\text{Gal}(\beta 1,4)\text{GlcNAc}(\beta 1,3)\text{Gal}(\beta 1,4)\text{Glc}$  ( $[\text{M}+\text{Na}]^+$ ,  $m/z$  730.2) and 10  $[^{13}\text{C}_6]$ lacto-*N*-neo-tetraose,  $[^{13}\text{C}_6]\text{Gal}(\beta 1,4)\text{GlcNAc}(\beta 1,3)\text{Gal}(\beta 1,4)\text{Glc}$  ( $[\text{M}+\text{Na}]^+$ ,  $m/z$  736.3).

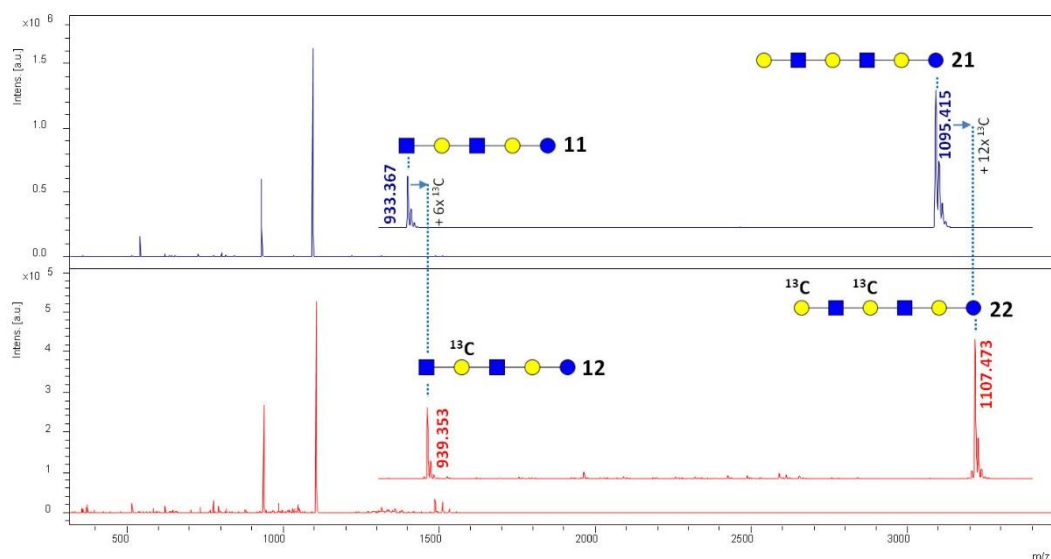

**Figure MTS3.** Mass spectrum (MALDI-TOF-MS) of compound **11** lacto-*N*-pentaose, GlcNAc( $\beta$ 1,3)Gal( $\beta$ 1,4)GlcNAc( $\beta$ 1,3)Gal( $\beta$ 1,4)Glc ( $[M+Na]^+$ ,  $m/z$  933.4), **12** [ $^{13}C_6$ ]lacto-*N*-pentaose, GlcNAc( $\beta$ 1,3)[ $^{13}C_6$ ]Gal( $\beta$ 1,4)GlcNAc( $\beta$ 1,3)Gal( $\beta$ 1,4)Glc ( $[M+Na]^+$ ,  $m/z$  939.4), **21** lacto-*N*-hexaose, Gal( $\beta$ 1,3)GlcNAc( $\beta$ 1,3)Gal( $\beta$ 1,4)GlcNAc( $\beta$ 1,3)Gal( $\beta$ 1,4)Glc ( $[M+Na]^+$ ,  $m/z$  1095.4) and **22** [ $^{13}C_6$ ]lacto-*N*-hexaose, [ $^{13}C_6$ ]Gal( $\beta$ 1,3)GlcNAc( $\beta$ 1,3)[ $^{13}C_6$ ]Gal( $\beta$ 1,4)GlcNAc( $\beta$ 1,3)Gal( $\beta$ 1,4)Glc ( $[M+Na]^+$ ,  $m/z$  1107.5).

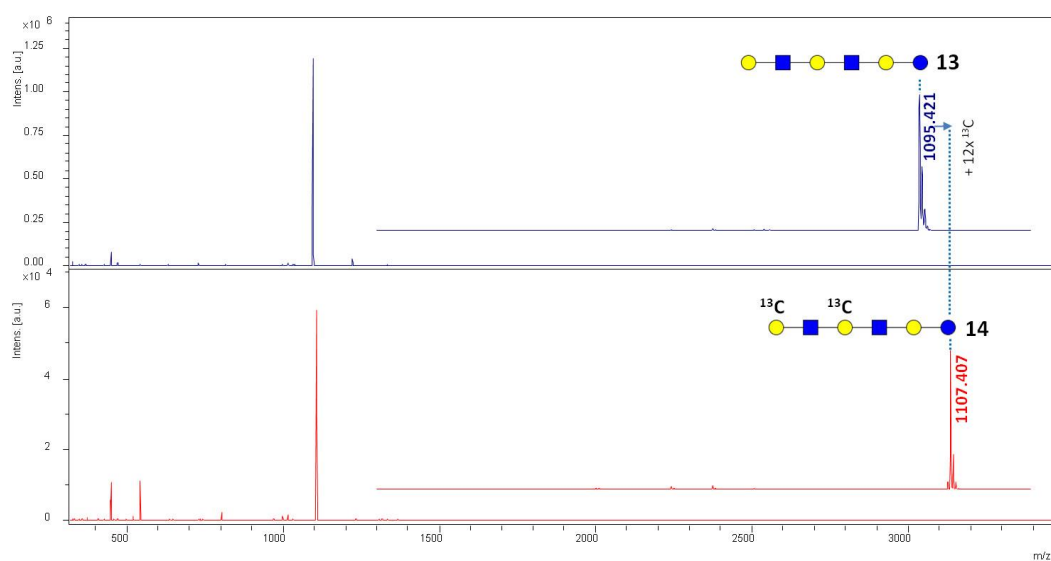

**Figure MTS4.** Mass spectrum (MALDI-TOF-MS) of compound **13** lacto-*N*-neo-hexaose, Gal( $\beta$ 1,4)GlcNAc( $\beta$ 1,3)Gal( $\beta$ 1,4)GlcNAc( $\beta$ 1,3)Gal( $\beta$ 1,4)Glc ( $[M+Na]^+$ ,  $m/z$  1095.4) and **14** [ $^{13}C_6$ ]lacto-*N*-neo-hexaose, [ $^{13}C_6$ ]Gal( $\beta$ 1,4)GlcNAc( $\beta$ 1,3)[ $^{13}C_6$ ]Gal( $\beta$ 1,4)GlcNAc( $\beta$ 1,3)Gal( $\beta$ 1,4)Glc ( $[M+Na]^+$ ,  $m/z$  1107.4).

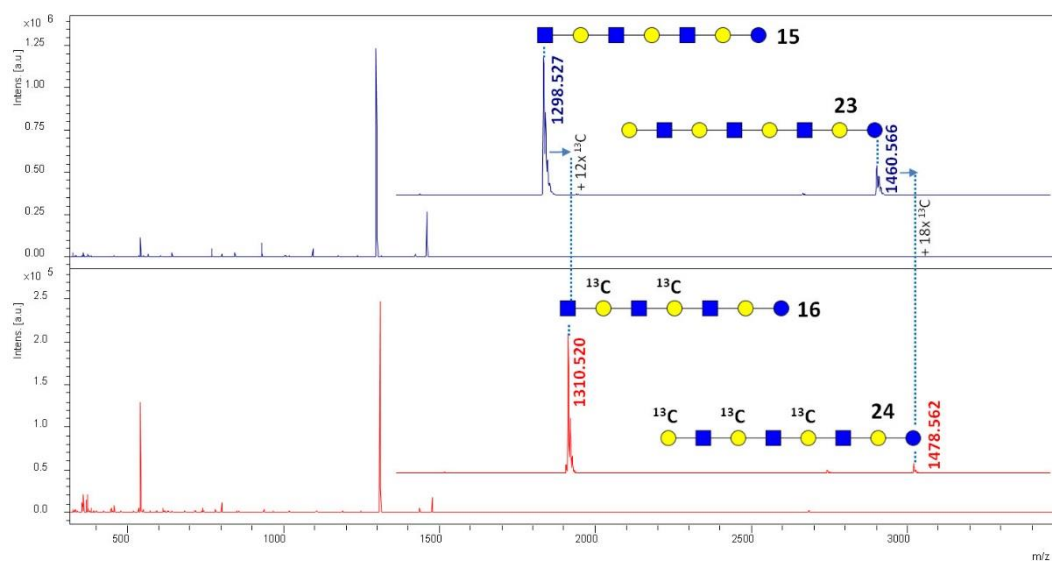

**Figure MTS5.** Mass spectrum (MALDI-TOF-MS) of compound **15** lacto-*N*-heptaose, GlcNAc( $\beta$ 1,3)Gal( $\beta$ 1,4)GlcNAc( $\beta$ 1,3)Gal( $\beta$ 1,4)GlcNAc( $\beta$ 1,3)Gal( $\beta$ 1,4)Glc ( $[M+Na]^+$ ,  $m/z$  1298.5), **16** [ $^{13}C_6$ ]lacto-*N*-heptaose, GlcNAc( $\beta$ 1,3)[ $^{13}C_6$ ]Gal( $\beta$ 1,4)GlcNAc( $\beta$ 1,3)[ $^{13}C_6$ ]Gal( $\beta$ 1,4)GlcNAc( $\beta$ 1,3)Gal( $\beta$ 1,4)Glc ( $[M+Na]^+$ ,  $m/z$  1310.5), **23** lacto-*N*-octaose, Gal( $\beta$ 1,3)GlcNAc( $\beta$ 1,3)Gal( $\beta$ 1,4)GlcNAc( $\beta$ 1,3)Gal( $\beta$ 1,4)GlcNAc( $\beta$ 1,3)Gal( $\beta$ 1,4)Glc ( $[M+Na]^+$ ,  $m/z$  1460.6) and **24** [ $^{13}C_6$ ]lacto-*N*-octaose, [ $^{13}C_6$ ]Gal( $\beta$ 1,3)GlcNAc( $\beta$ 1,3)[ $^{13}C_6$ ]Gal( $\beta$ 1,4)GlcNAc( $\beta$ 1,3)[ $^{13}C_6$ ]Gal( $\beta$ 1,4)GlcNAc( $\beta$ 1,3)Gal( $\beta$ 1,4)Glc ( $[M+Na]^+$ ,  $m/z$  1478.6).

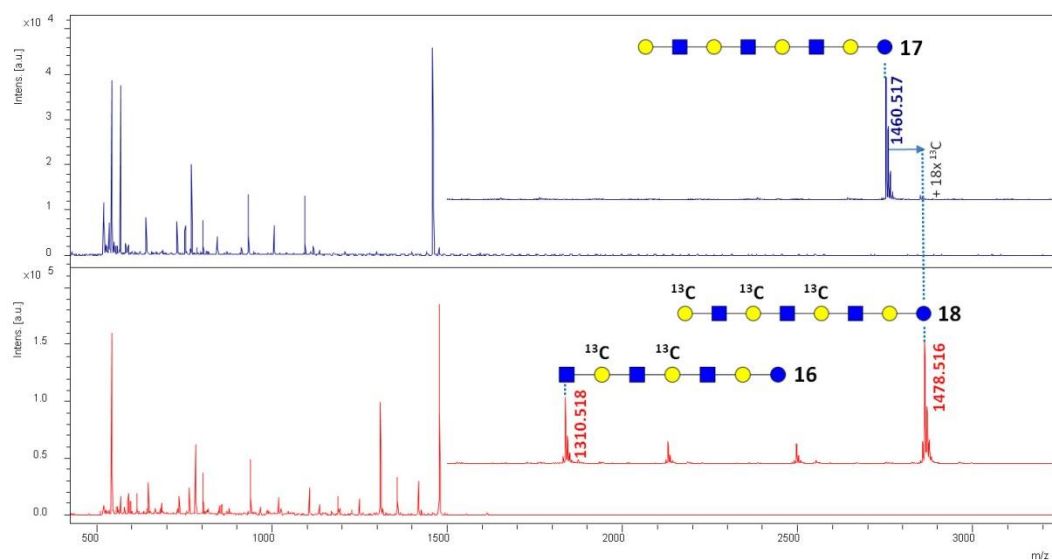

**Figure MTS6.** Mass spectrum (MALDI-TOF-MS) of compound **16** [ $^{13}C_6$ ]lacto-*N*-heptaose, GlcNAc( $\beta$ 1,3)[ $^{13}C_6$ ]Gal( $\beta$ 1,4)GlcNAc( $\beta$ 1,3)[ $^{13}C_6$ ]Gal( $\beta$ 1,4)GlcNAc( $\beta$ 1,3)Gal( $\beta$ 1,4)Glc ( $[M+Na]^+$ ,  $m/z$  1310.5), **17** lacto-*N*-neo-octaose, Gal( $\beta$ 1,4)GlcNAc( $\beta$ 1,3)Gal( $\beta$ 1,4)GlcNAc( $\beta$ 1,3)Gal( $\beta$ 1,4)GlcNAc( $\beta$ 1,3)Gal( $\beta$ 1,4)Glc ( $[M+Na]^+$ ,  $m/z$  1460.5) and **18** [ $^{13}C_6$ ]lacto-*N*-octaose, [ $^{13}C_6$ ]Gal( $\beta$ 1,4)GlcNAc( $\beta$ 1,3)[ $^{13}C_6$ ]Gal( $\beta$ 1,4)GlcNAc( $\beta$ 1,3)[ $^{13}C_6$ ]Gal( $\beta$ 1,4)GlcNAc( $\beta$ 1,3)Gal( $\beta$ 1,4)Glc ( $[M+Na]^+$ ,  $m/z$  1478.5).

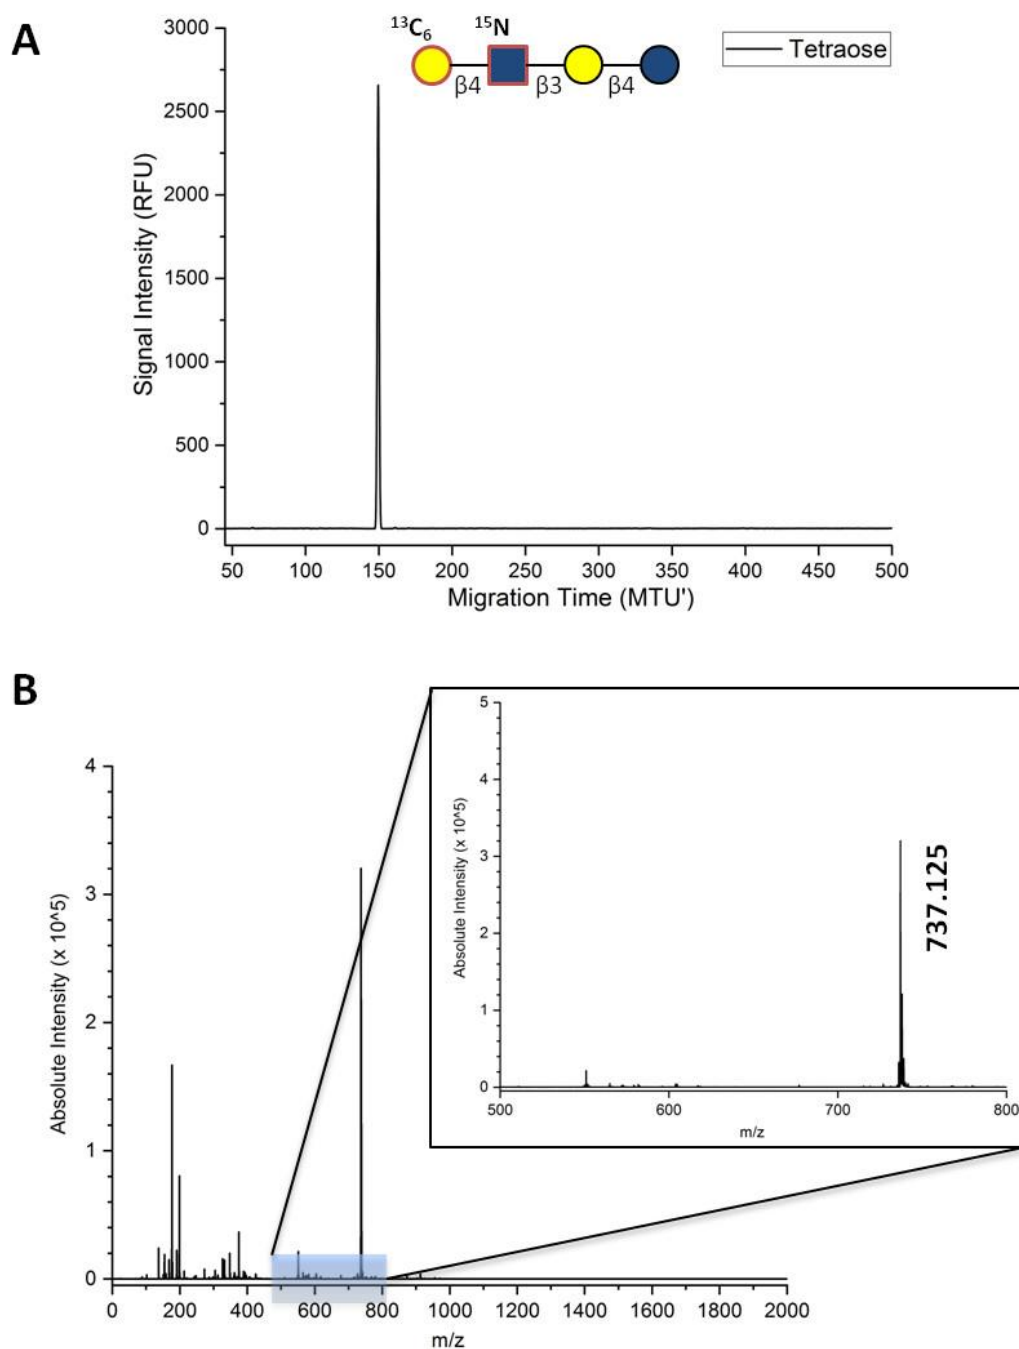

**Figure MTS7.** (A) xCGE-LIF analysis of the purified [ $^{15}\text{N}/^{13}\text{C}_6$ ]lacto-*N*-neo-tetraose, (B) mass spectrum (MALDI-TOF-MS) of the purified compound **25** [ $^{13}\text{C}_6/^{15}\text{N}$ ]lacto-*N*-neo-tetraose, [ $^{13}\text{C}_6$ ]Gal( $\beta$ 1,4)[ $^{15}\text{N}$ ]GlcNAc( $\beta$ 1,3)Gal( $\beta$ 1,4)Glc ( $[\text{M}+\text{Na}]^+$ ,  $m/z$  737.1).

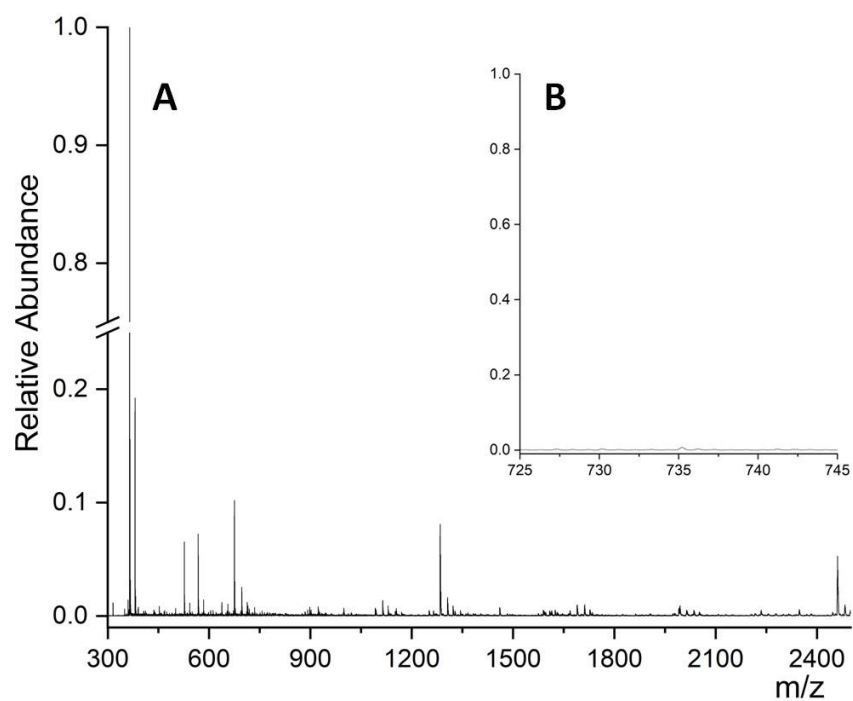

**Figure MTS8.** MALDI-TOF mass spectrum of PGC-SPE extracted bovine milk (A) and the magnified  $m/z$  range from 726 to 746 (B).

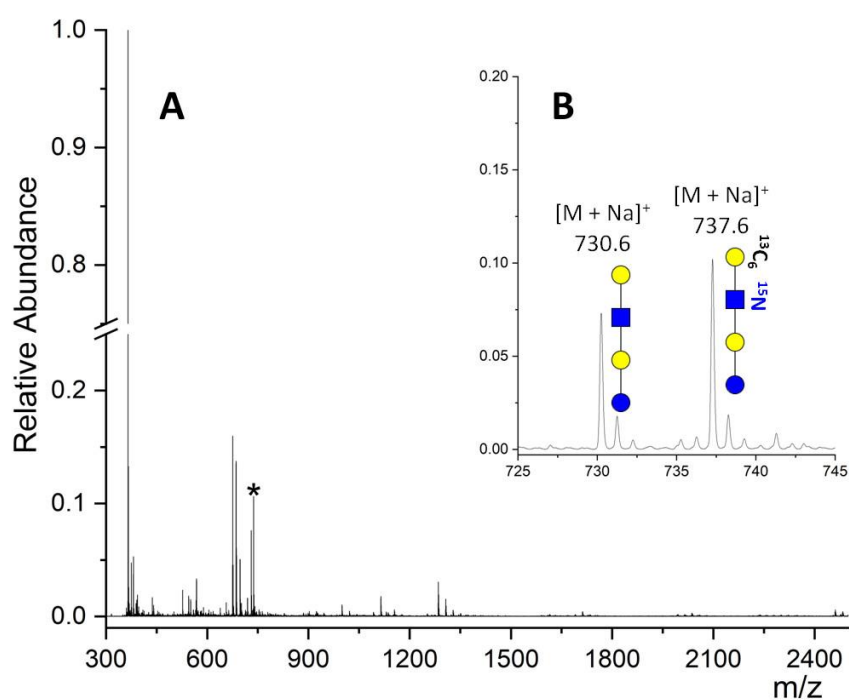

**Figure MTS9.** MALDI-TOF mass spectrum of PGC-SPE extracted bovine milk spiked with LNnT and  $[^{13}C_6/^{15}N]$ LNnT in the  $m/z$  range 300 to 2500 (A) and a zoom into the  $m/z$  range 725 to 745 (B). An asterisk indicates the signals corresponding to LNnT ( $m/z = 730.6204 [M+Na]^+$ ) and  $[^{13}C_6/^{15}N]$ LNnT ( $m/z = 737.641 [M+Na]^+$ ).



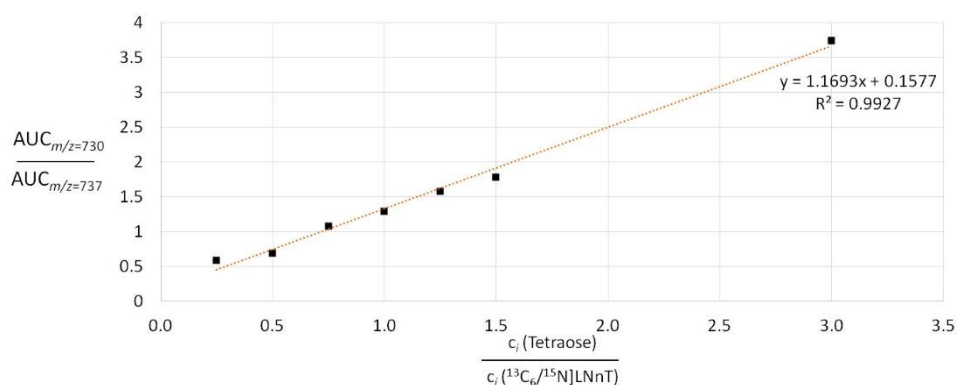

**Figure S7.** Calibration plot for the response function correlating relative changes of the AUC to varying molar ratios of tetraose to  $[^{13}\text{C}_6/^{15}\text{N}] \text{LNnT}$ . 1  $\mu\text{L}$  of  $[^{13}\text{C}_6/^{15}\text{N}] \text{LNnT}$  (1 mM) was mixed with human milk (0.1 to 3  $\mu\text{L}$ ). The graph displays averaged triplicates with error bars representing the standard deviation.

### Purity determination via TOC analysis

According to the xCGE-LIF analysis, the purified  $[^{15}\text{N}/^{13}\text{C}_6] \text{LNnT}$  sample is broadly free from other sugar structures, accessible for APTS labelling, like the remaining synthesis substrates and intermediates. This indicates smaller synthesis compounds were widely removed during the ultra-dialysis (cut-off - 100-500 Da, FloatALyser® G2). To complete the product evaluation, a TOC analysis was implemented into the analytical workflow. Presuming the purified  $[^{15}\text{N}/^{13}\text{C}_6] \text{LNnT}$  sample is largely free of miscellaneous organic carbon allows us to calculate a sample purity of 96.05% based on the TOC data.

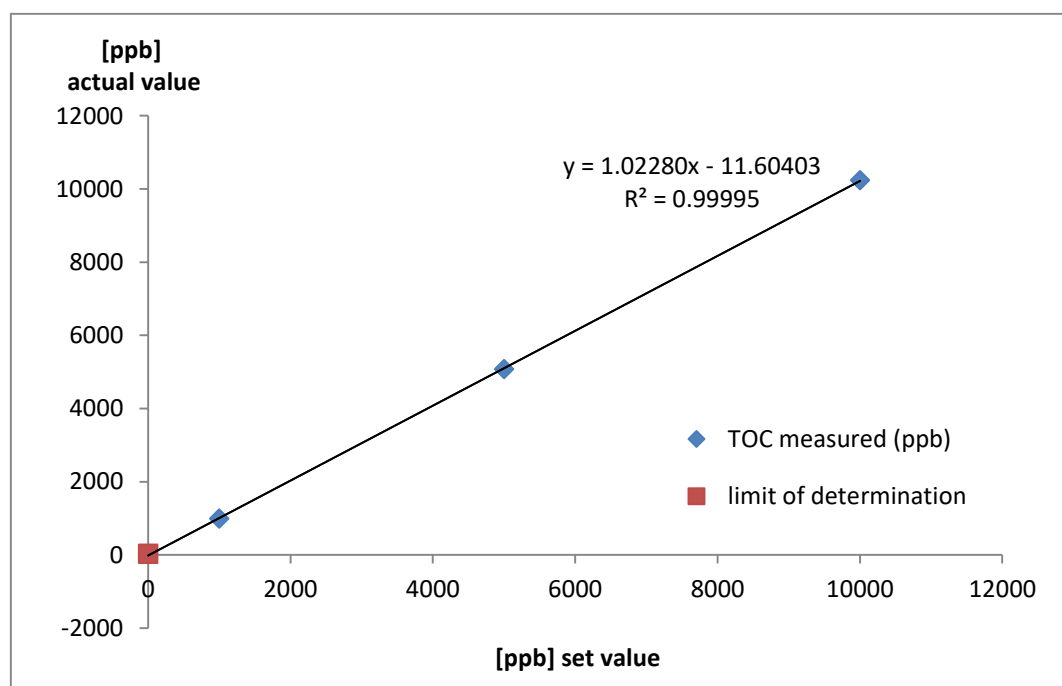

**Figure TOCS1.** Initial calibration with potassium hydrogen phthalate. The limit of determination was determined to 4.1 ppb, the limit of quantification to 12.3 ppb and the  $R^2$  of the initial calibration features 0.99995.

A)

Lactose monohydrate

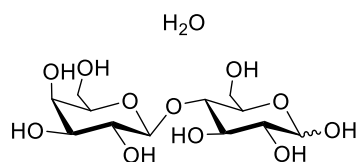

Chemical Formula:  $C_{12}H_{24}O_{12}$   
 Exact Mass: 360,13  
 Elemental Analysis: C, 40.00; H, 6.71; O, 53.28

B)

 $[^{15}N/^{13}C_6]LNnT$ 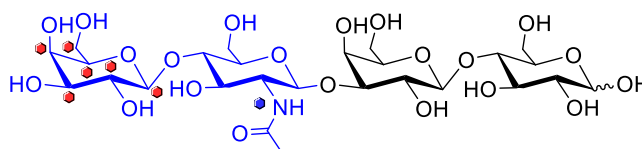

Chemical Formula:  $C_{20}^{13}C_6H_{45}^{15}NO_{21}$   
 Exact Mass: 714,27  
 Elemental Analysis: C, 44.54; H, 6.35; N, 2.10; O, 47.02

**Scheme TOCS1.** Calculated exact mass and elemental mass percentage for (A) Lactose monohydrate and (B)  $[^{15}N/^{13}C_6]LNnT$ .

**Table TOCS1.** Measured TOC values and carbon mass percentage of highly pure commercial references substances as well as from the  $[^{15}N/^{13}C_6]LNnT$  sample.

| Sample                          | Sample amount<br>[mg] | Sample volume<br>[mL] | TOC (ppb) | TOC<br>[μg] | Carbon Mass<br>Percentage<br>[m-%] |
|---------------------------------|-----------------------|-----------------------|-----------|-------------|------------------------------------|
| Lactose monohydrate,<br>(99,5%) | 1.78                  | 17.8                  | 40053     | 712.9       | 40.23                              |
|                                 |                       |                       | 40401     | 719.1       |                                    |
| Lactose monohydrate,<br>Sigma   | 1.27                  | 12.7                  | 39205     | 497.9       | 39.09                              |
|                                 |                       |                       | 38967     | 494.9       |                                    |
| Maltose monohydrate,<br>Supelco | 1.25                  | 12.5                  | 40248     | 503.1       | 40.29                              |
|                                 |                       |                       | 40336     | 504.2       |                                    |
| $[^{15}N/^{13}C_6]LNnT$         | 0.05                  | 9                     | 2576      | 23.2        | 46.37                              |

**Sample Availability:** Samples of the compounds are not available from the authors.

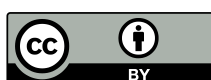

© 2018 by the authors. Submitted for possible open access publication under the terms and conditions of the Creative Commons Attribution (CC BY) license (<http://creativecommons.org/licenses/by/4.0/>).
